# Supplementary material for: Theoretical study of aza-polycyclic aromatic hydrocarbons (aza-PAHs), modelling carbocations from oxidized metabolites and their covalent adducts with representative nucleophiles
Source: Royal Society of Chemistry journal article supplement (doi:10.1039/b416429f), 2005-01-01
Supplement: b416429f-esi.pdf [file b416429f-esi.pdf]

**Theoretical (DFT, GIAO, NICS, AM1) Study of Aza-Polycyclic Aromatic  
Hydrocarbons (Aza-PAHs), Modeling Carbocations from Oxidized Metabolites and  
Covalent Adducts with Representative Nucleophiles**

Gabriela L. Borosky and Kenneth K. Laali

|                                                                                                                                                      | Page |
|------------------------------------------------------------------------------------------------------------------------------------------------------|------|
| <b>Figure S1.</b> Computed NPA-derived heavy atom charges ( $\Delta$ charges related to the neutral compound in parentheses).                        | S3   |
| <b>Figure S2.</b> Computed NPA-derived overall charges over CH, NH and OH units ( $\Delta$ charges related to the neutral compound in parentheses).  | S7   |
| <b>Figure S3.</b> Computed $^{13}\text{C}$ NMR chemical shifts ( $\Delta\delta$ $^{13}\text{C}$ 's relative to the neutral compound in parentheses). | S11  |
| <b>Figure S4.</b> Computed NICS values ( $\Delta$ NICS related to the neutral compound in parentheses).                                              | S15  |
| <b>Figure S5.</b> Superimposed structures of $1\text{H}^+$ and $2\text{H}^+$ adducts with guanine.                                                   | S19  |
| <b>Table S1.</b> Cartesian coordinates of the optimized structure for $1\text{H}^+$ .                                                                | S20  |
| <b>Table S2.</b> Cartesian coordinates of the optimized structure for $2\text{H}^+$ .                                                                | S21  |
| <b>Table S3.</b> Cartesian coordinates of the optimized structure for $3\text{H}^+$ .                                                                | S22  |
| <b>Table S4.</b> Cartesian coordinates of the optimized structure for $4\text{H}^+$ .                                                                | S23  |
| <b>Table S5.</b> Cartesian coordinates of the optimized structure for $5\text{H}^+$ .                                                                | S24  |
| <b>Table S6.</b> Cartesian coordinates of the optimized structure for $6\text{H}^+$ .                                                                | S25  |

|                                                                                                 |     |
|-------------------------------------------------------------------------------------------------|-----|
| <b>Table S7.</b> Cartesian coordinates of the optimized structure for <b>7H<sup>+</sup></b> .   | S26 |
| <b>Table S8.</b> Cartesian coordinates of the optimized structure for <b>8H<sup>+</sup></b> .   | S27 |
| <b>Table S9.</b> Cartesian coordinates of the optimized structure for <b>9H<sup>+</sup></b> .   | S28 |
| <b>Table S10.</b> Cartesian coordinates of the optimized structure for <b>10H<sup>+</sup></b> . | S29 |
| <b>Table S11.</b> Cartesian coordinates of the optimized structure for <b>11H<sup>+</sup></b> . | S30 |
| <b>Table S12.</b> Cartesian coordinates of the optimized structure for <b>12H<sup>+</sup></b> . | S31 |
| <b>Table S13.</b> Cartesian coordinates of the optimized structure for <b>13H<sup>+</sup></b> . | S32 |
| <b>Table S14.</b> Cartesian coordinates of the optimized structure for <b>14H<sup>+</sup></b> . | S33 |
| <b>Table S15.</b> Cartesian coordinates of the optimized structure for <b>15H<sup>+</sup></b> . | S34 |
| <b>Table S16.</b> Cartesian coordinates of the optimized structure for <b>16H<sup>+</sup></b> . | S35 |
| <b>Table S17.</b> Cartesian coordinates of the optimized structure for <b>17H<sup>+</sup></b> . | S36 |
| <b>Table S18.</b> Cartesian coordinates of the optimized structure for <b>18H<sup>+</sup></b> . | S37 |

**Figure S1.** Computed NPA-derived heavy atom charges ( $\Delta$ charges related to the neutral compound in parentheses). [Dark circles are roughly proportional to the magnitude of  $\Delta$ charges, and white circles to N  $\Delta$ charges; threshold was set to 0.030].

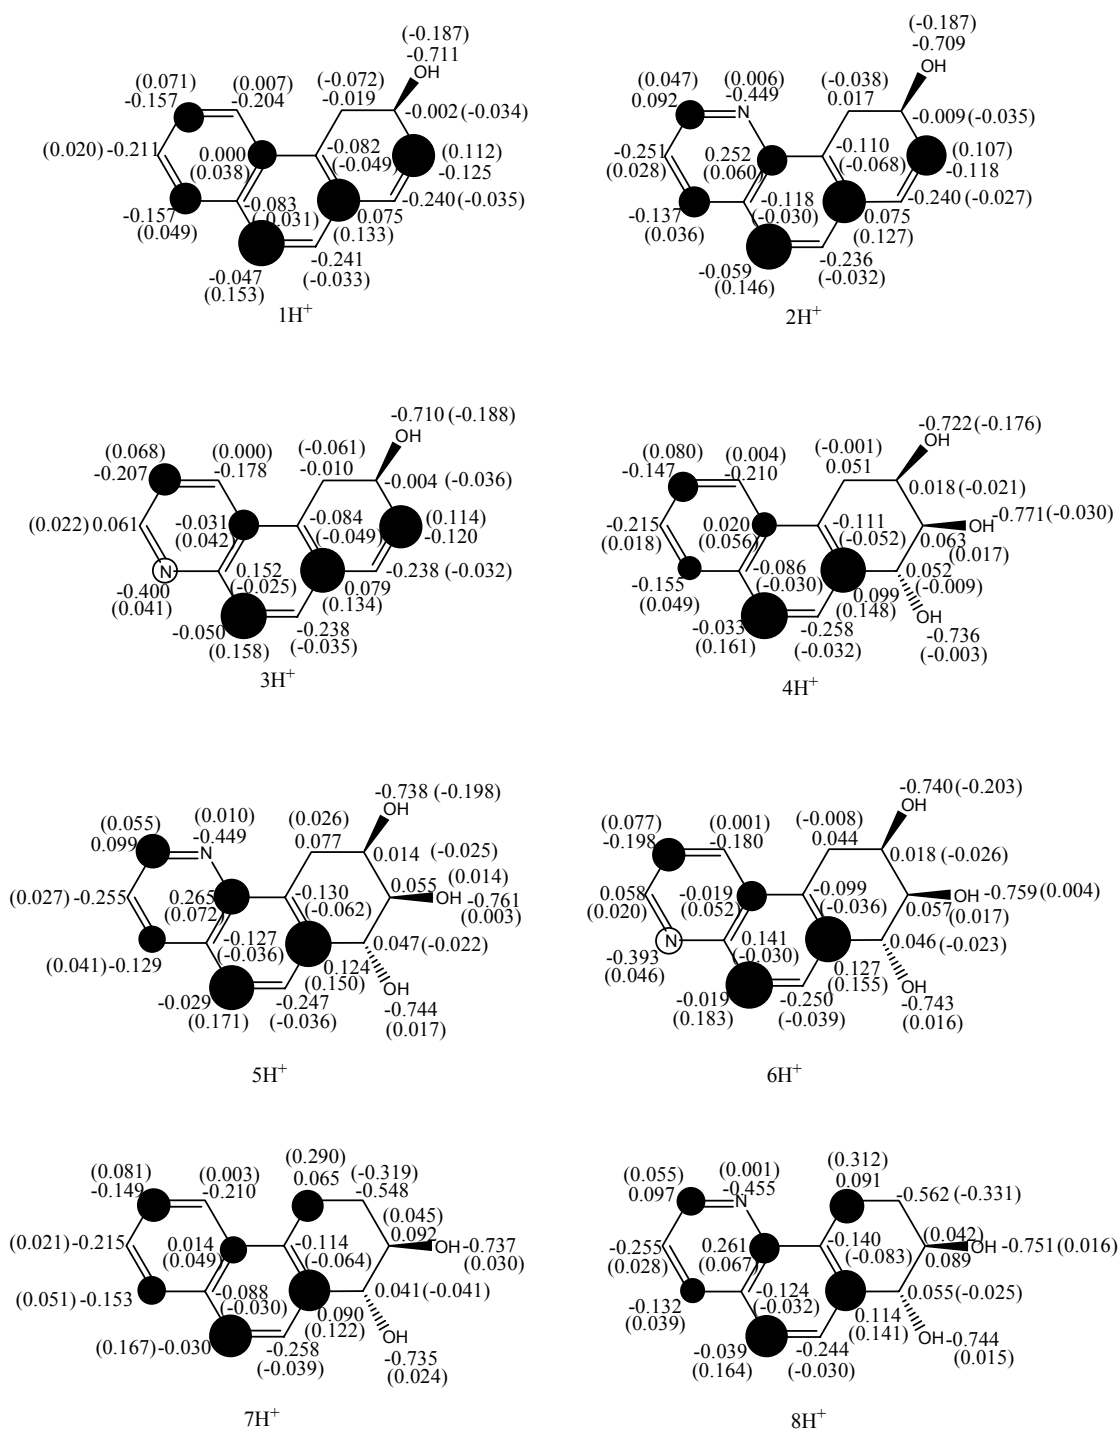

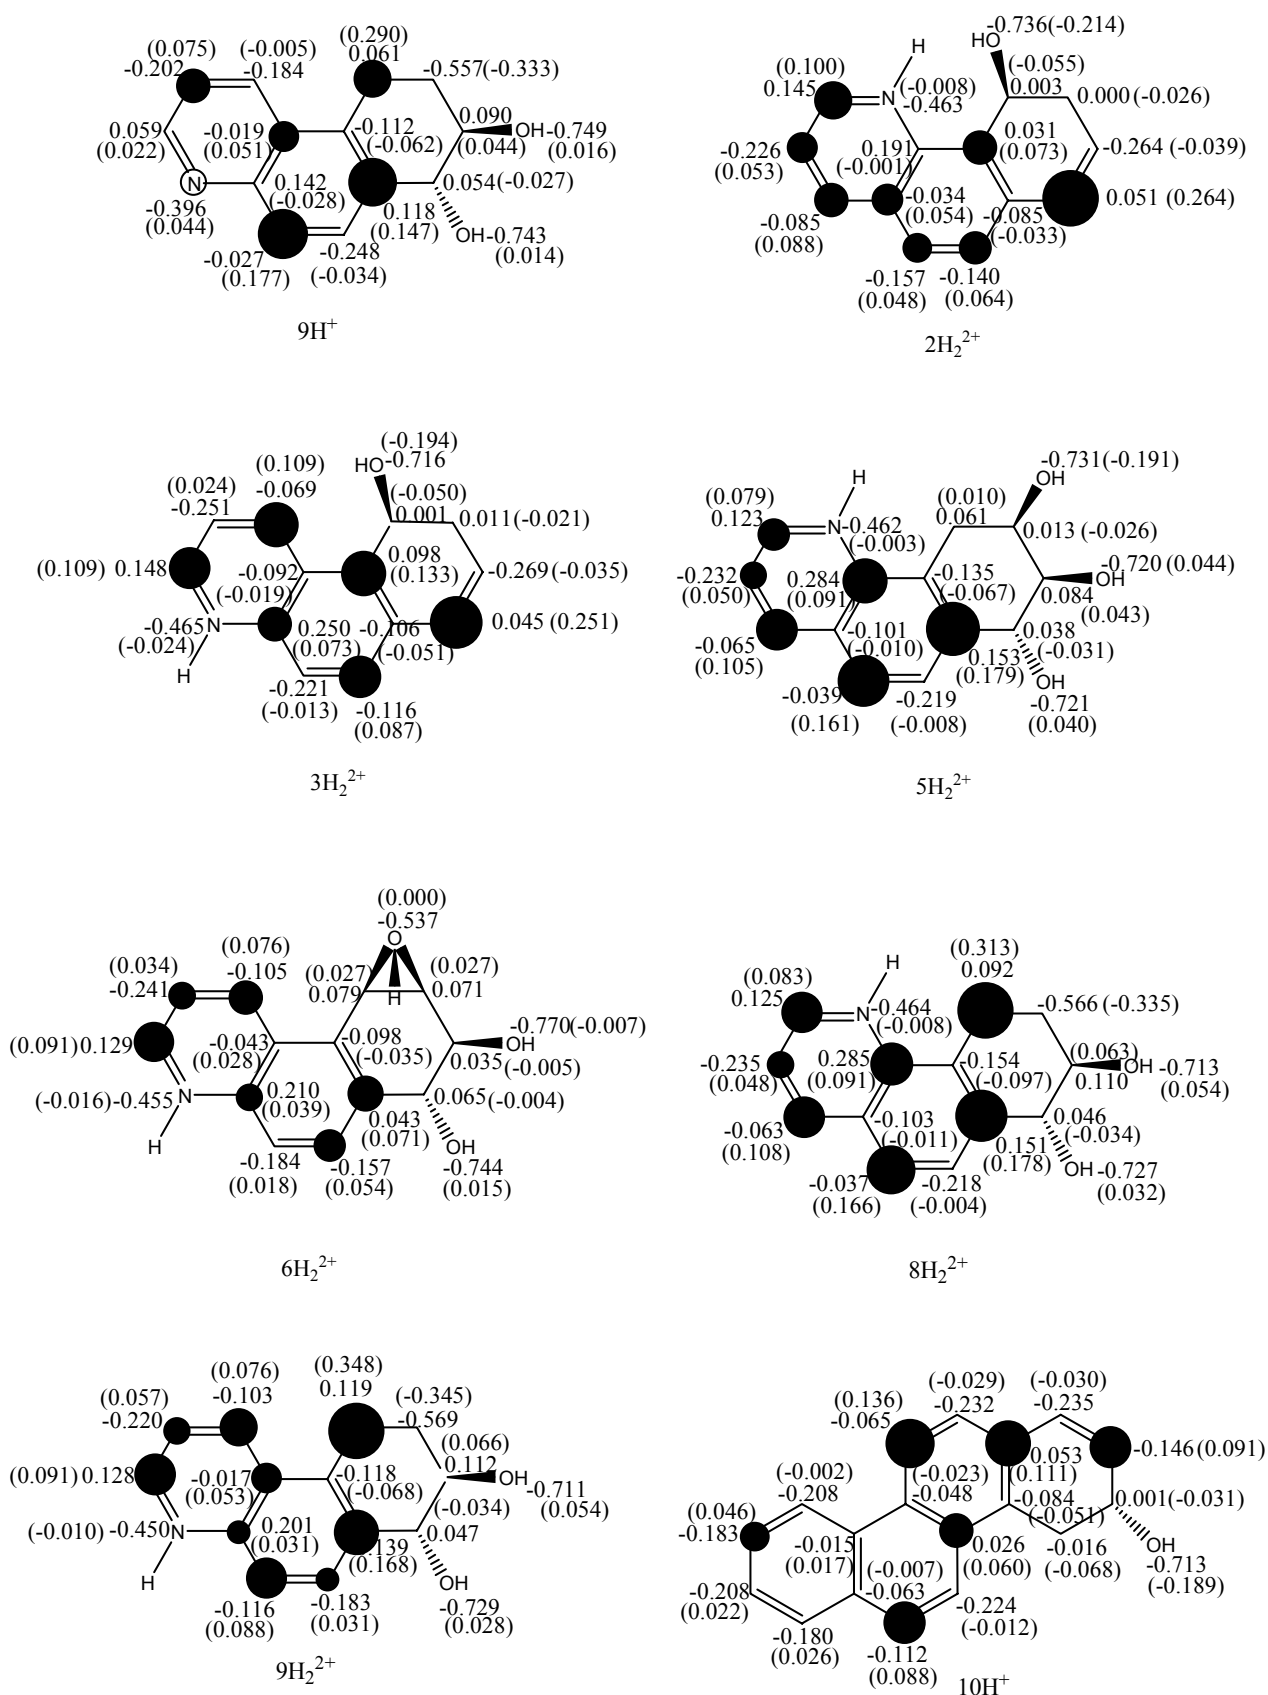

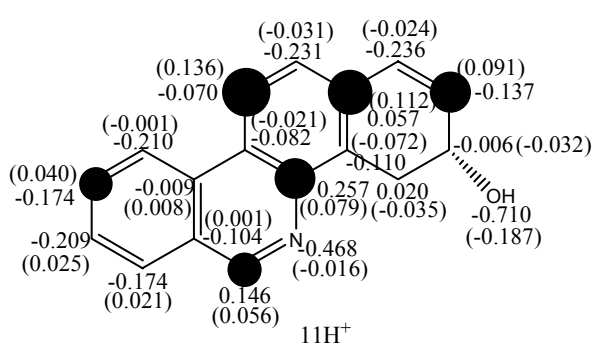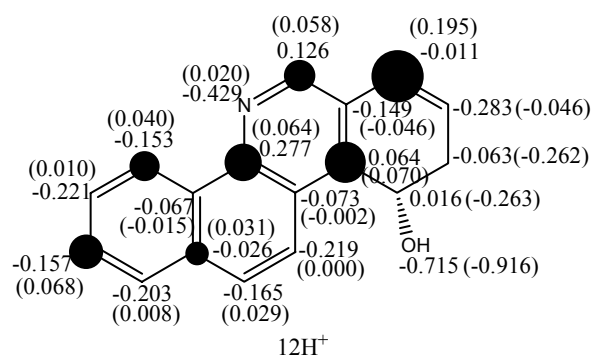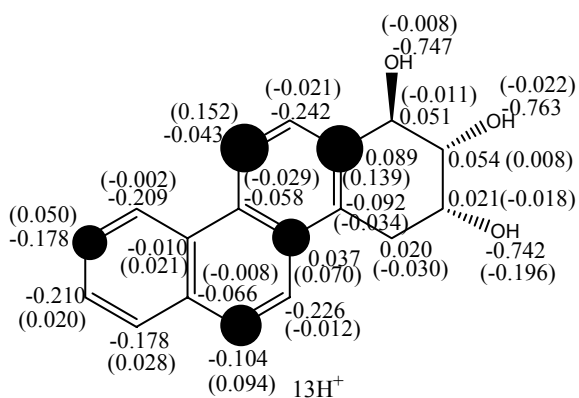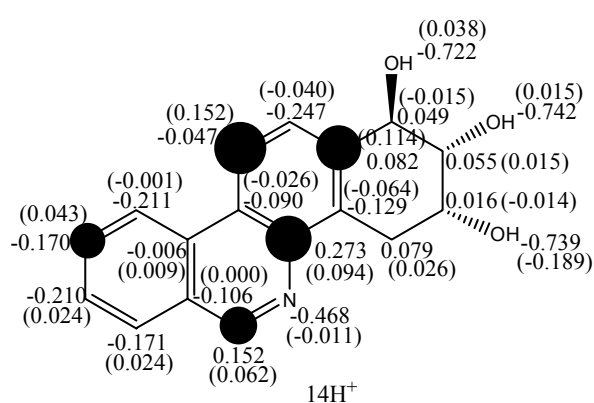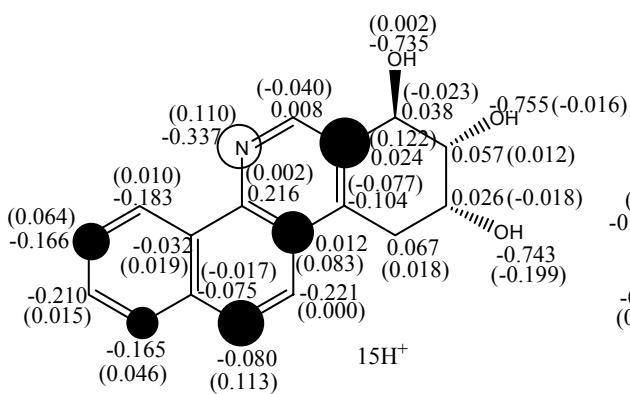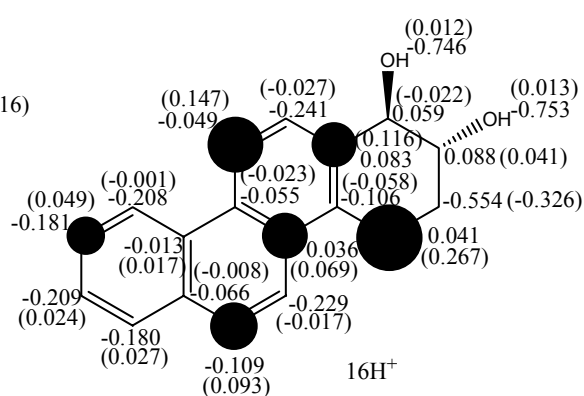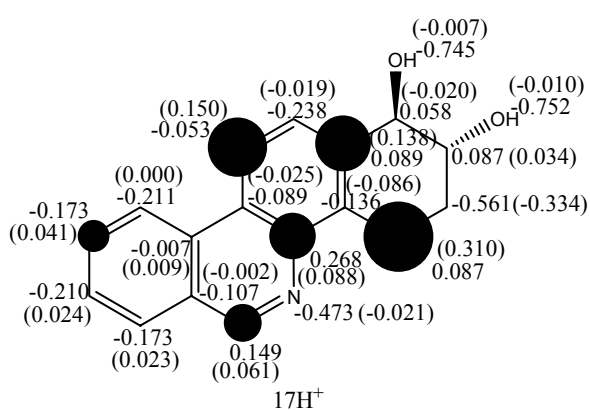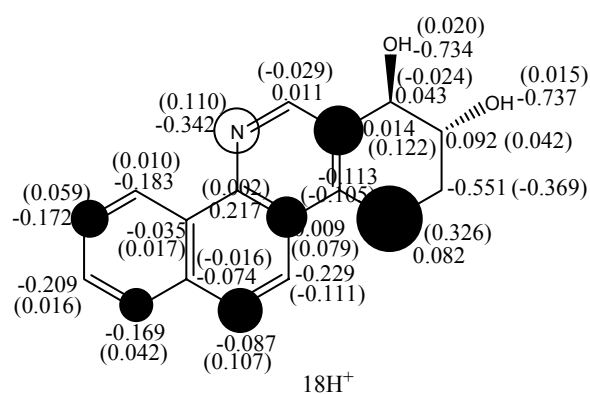

Electronic Supplementary Material for Organic & Biomolecular Chemistry  
This journal is © The Royal Society of Chemistry 2005

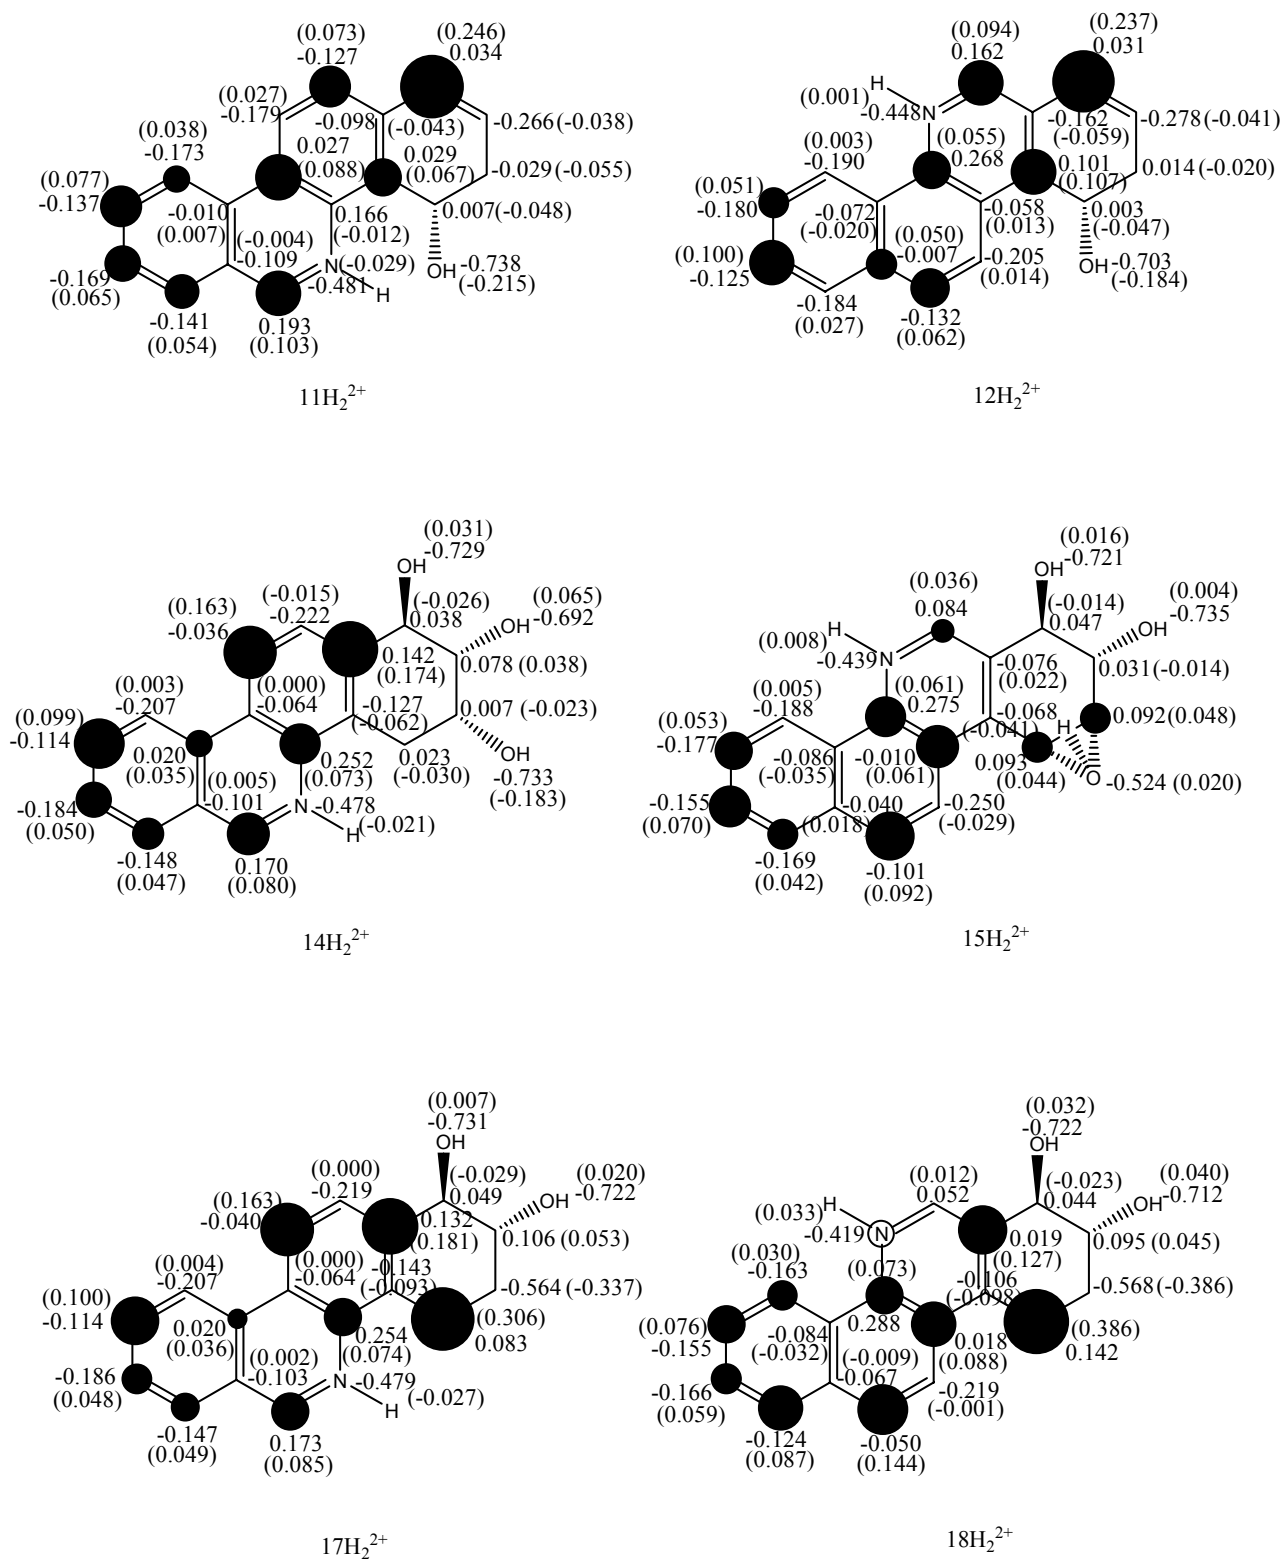

**Figure S2.** Computed NPA-derived overall charges over CH, NH and OH units ( $\Delta$ charges related to the neutral compound in parentheses). [Dark circles are roughly proportional to the magnitude of CH  $\Delta$ charges, and white circles to NH  $\Delta$ charges; threshold was set to 0.030].

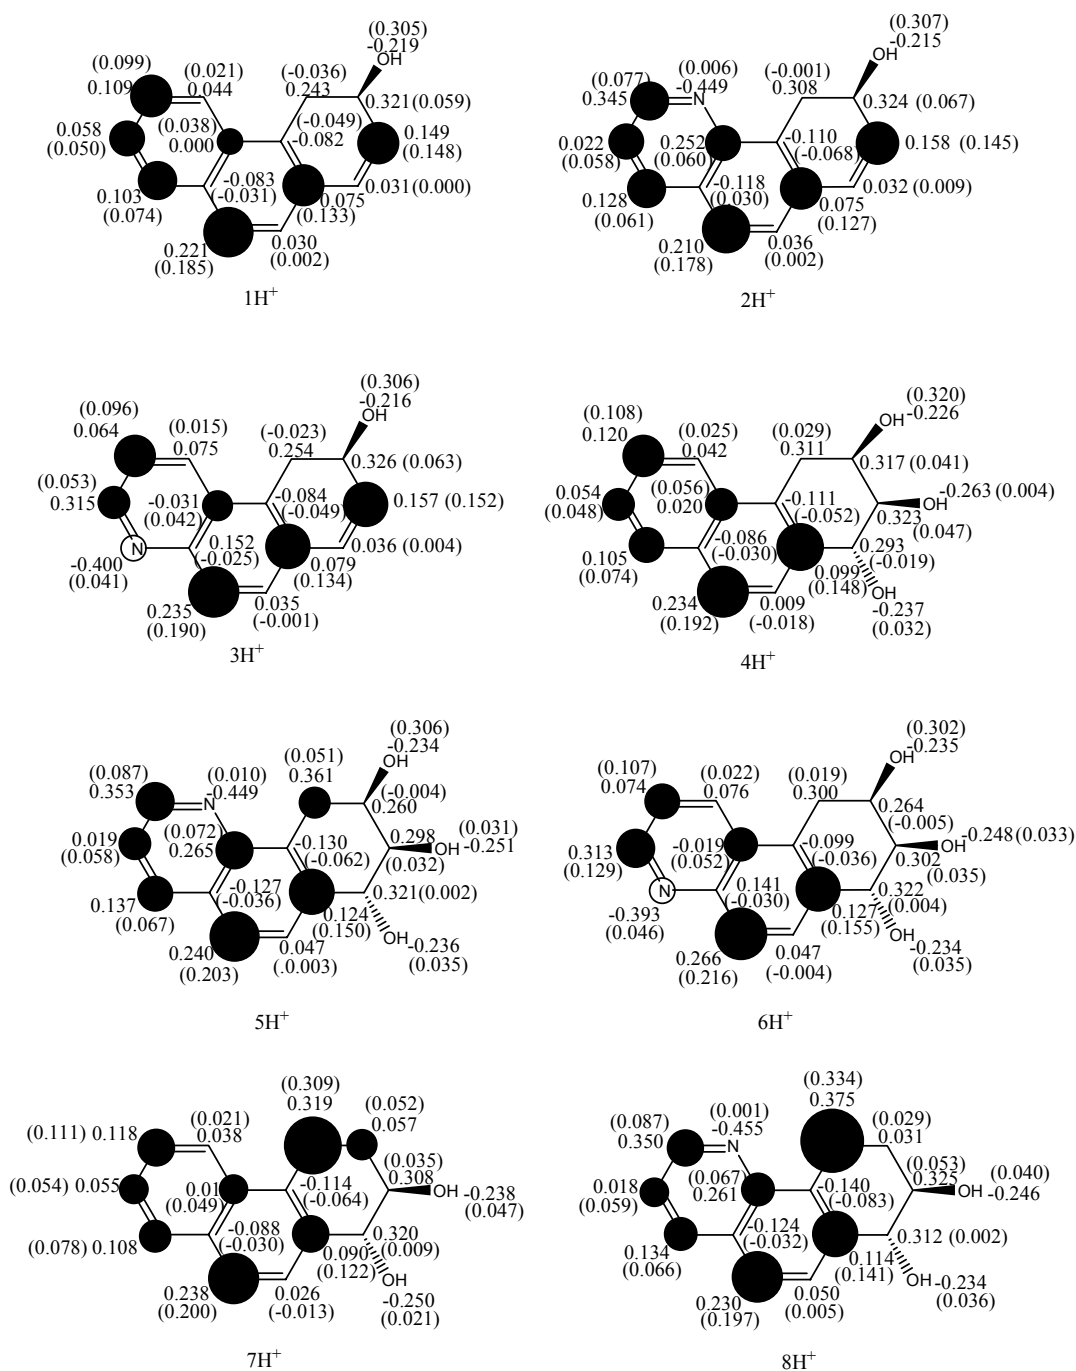

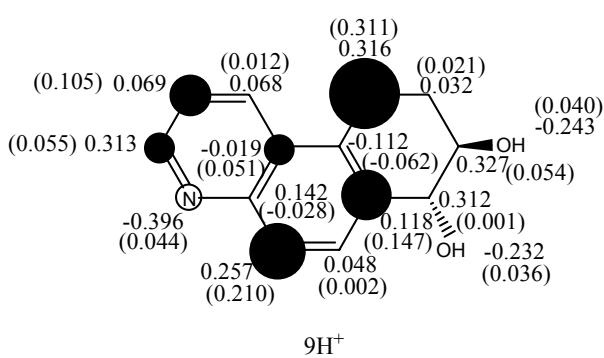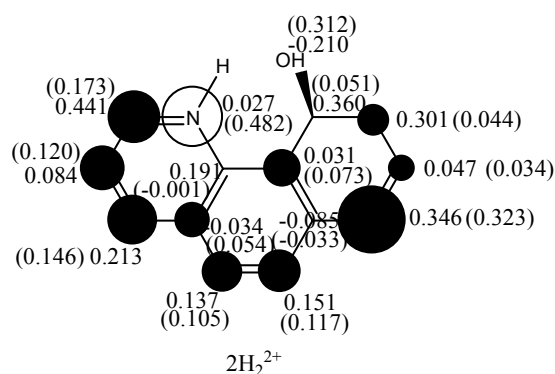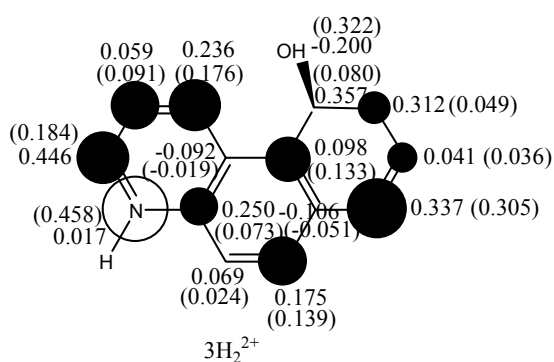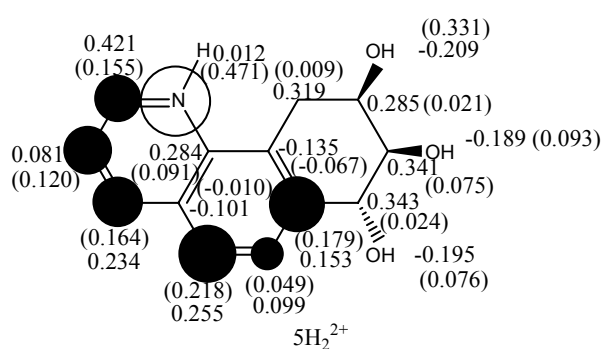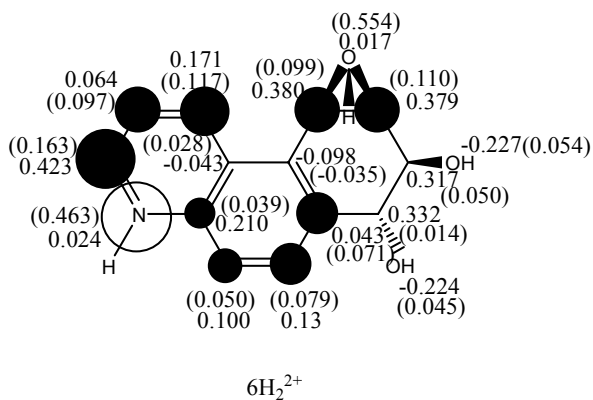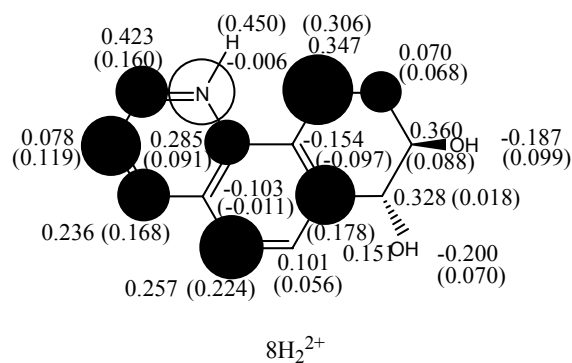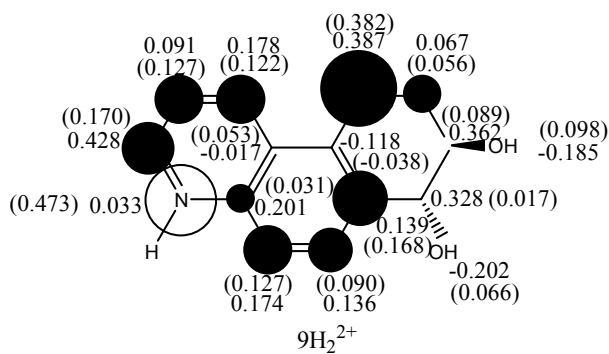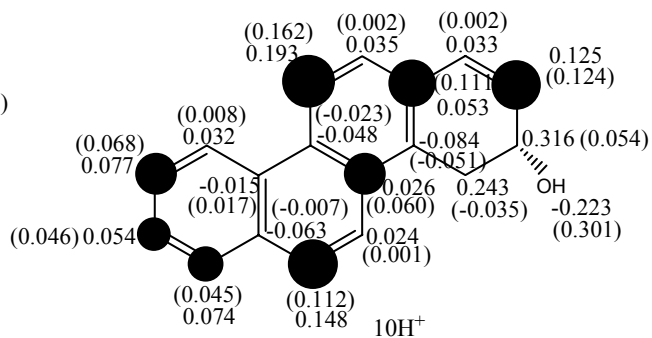



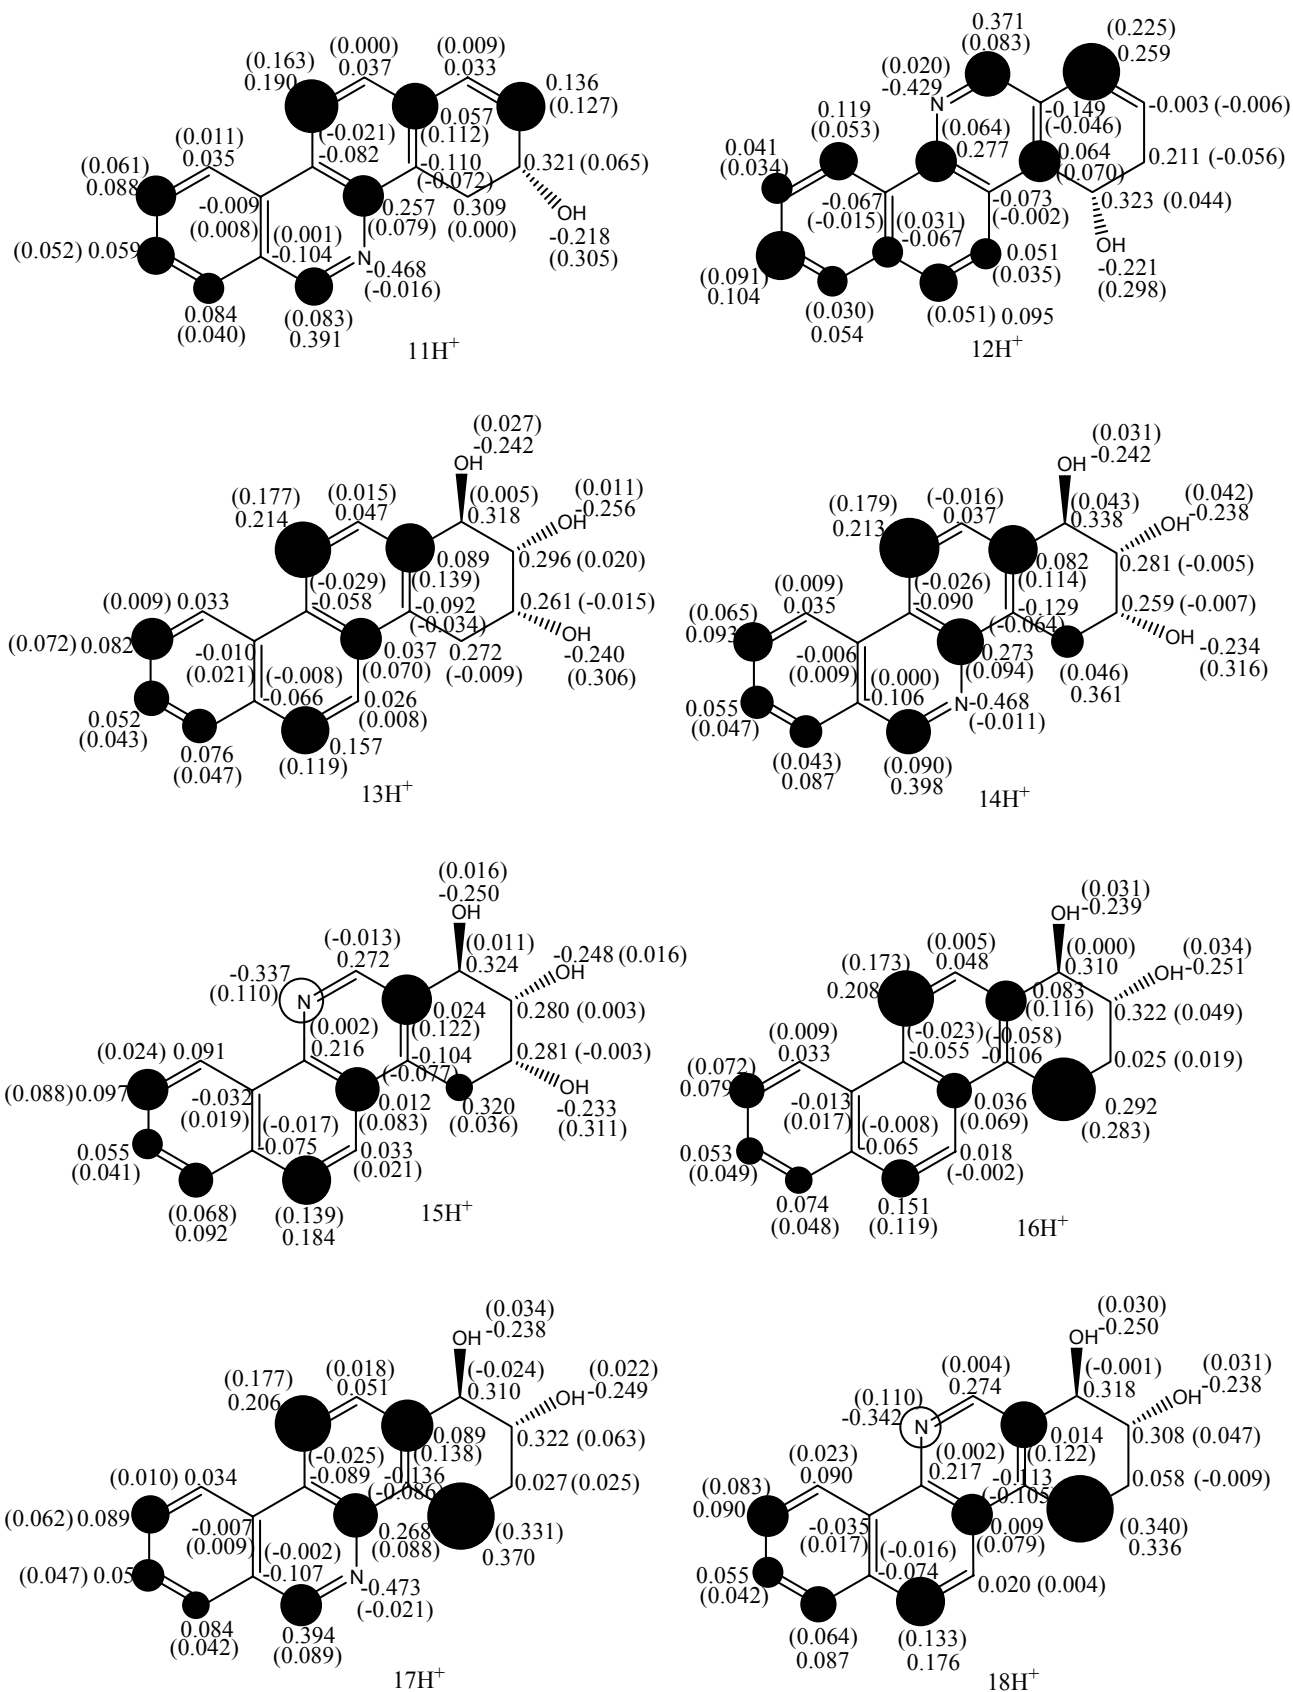

Electronic Supplementary Material for Organic & Biomolecular Chemistry  
This journal is © The Royal Society of Chemistry 2005

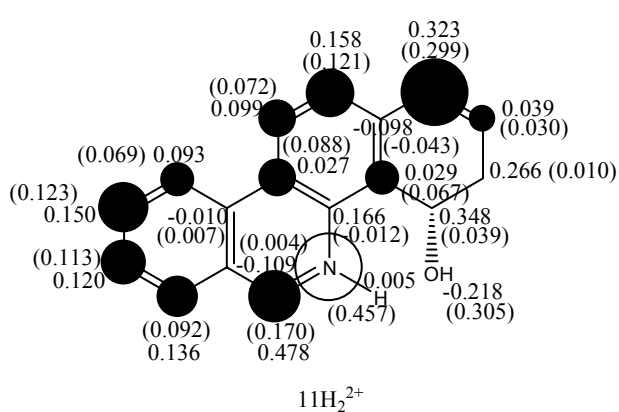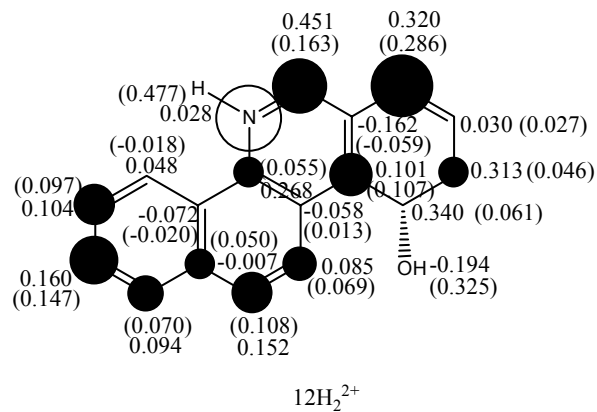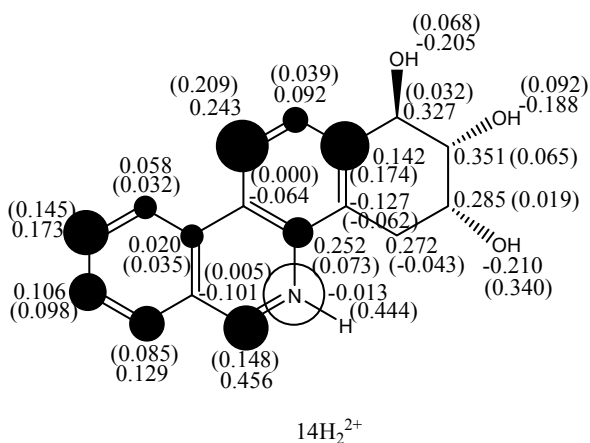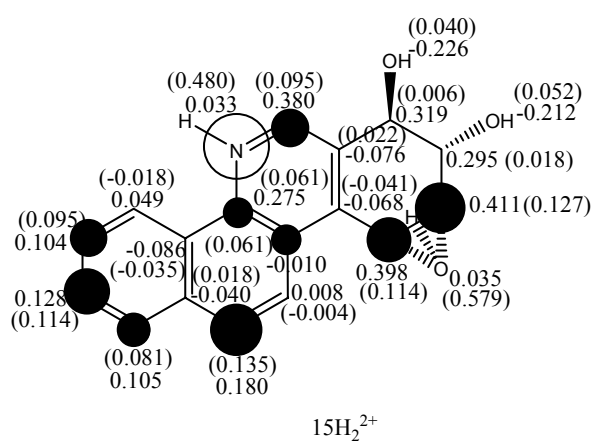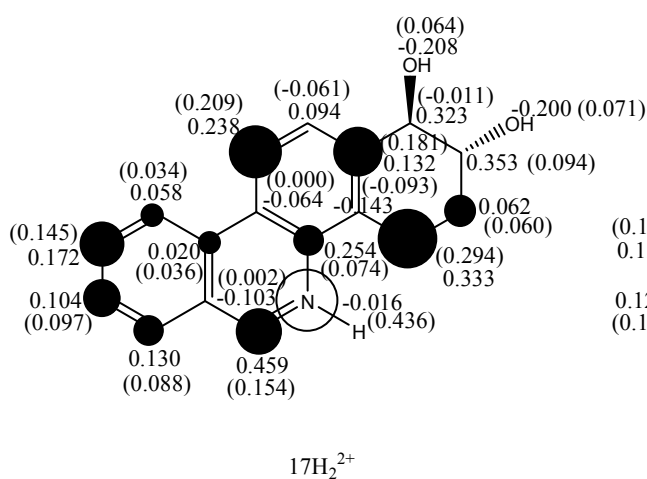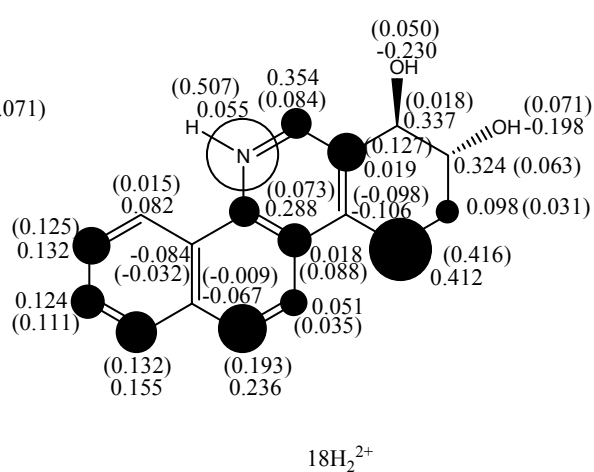

**Figure S3.** Computed  $^{13}\text{C}$  NMR chemical shifts ( $\Delta\delta$   $^{13}\text{C}$ 's relative to the neutral compound in parentheses). [Dark circles are roughly proportional to the magnitude of  $\Delta\delta$   $^{13}\text{C}$ ; threshold was set to 10 ppm].

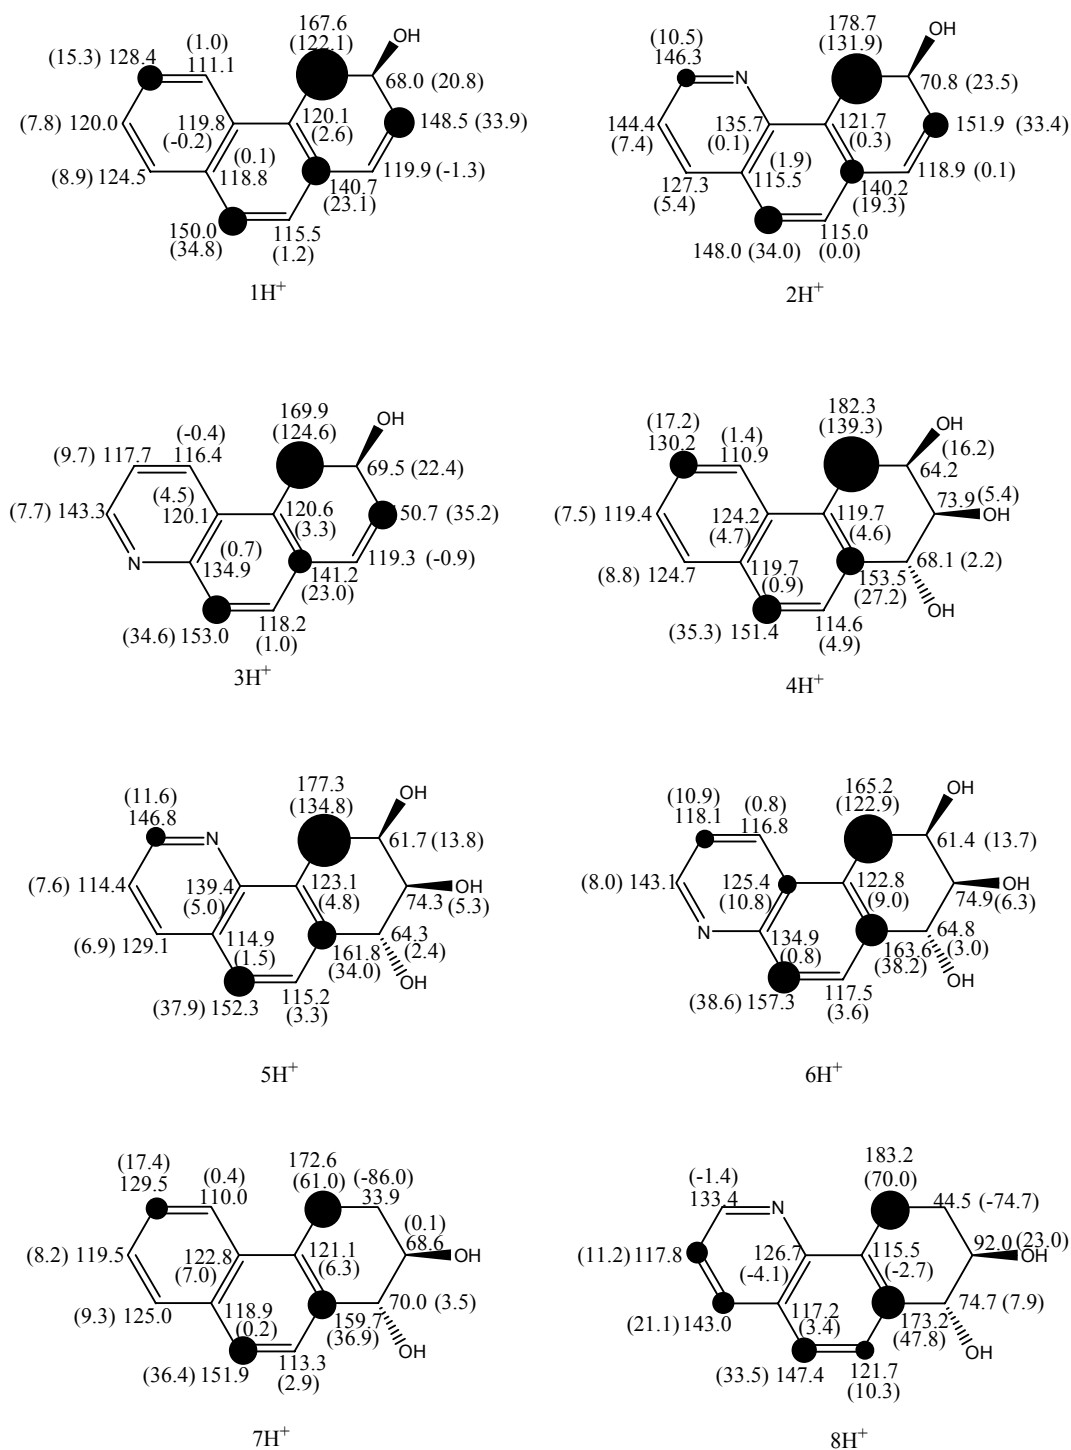

Electronic Supplementary Material for Organic & Biomolecular Chemistry  
 This journal is © The Royal Society of Chemistry 2005

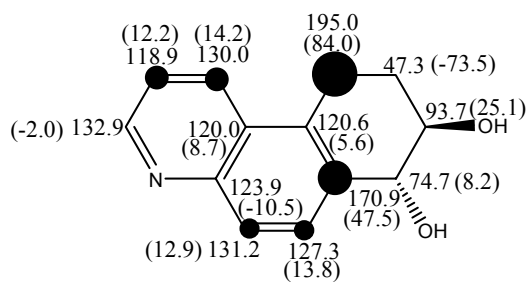

9H<sup>+</sup>

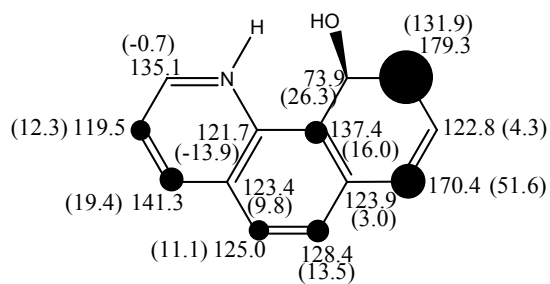

2H<sub>2</sub><sup>2+</sup>

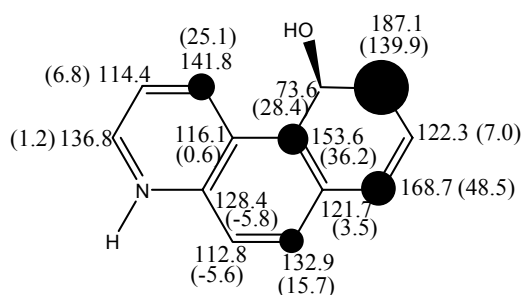

3H<sub>2</sub><sup>2+</sup>

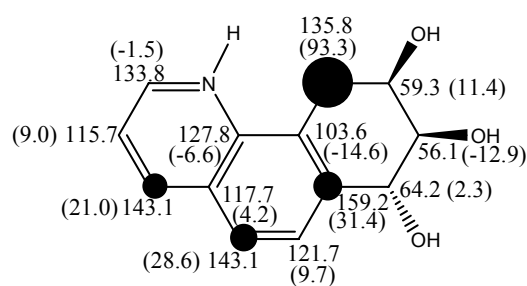

5H<sub>2</sub><sup>2+</sup>

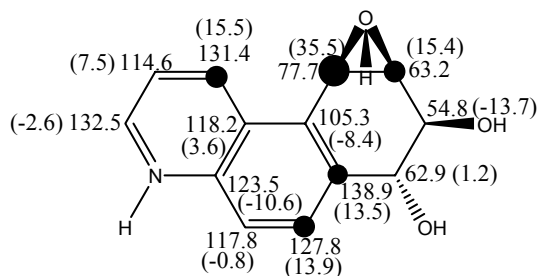

6H<sub>2</sub><sup>2+</sup>

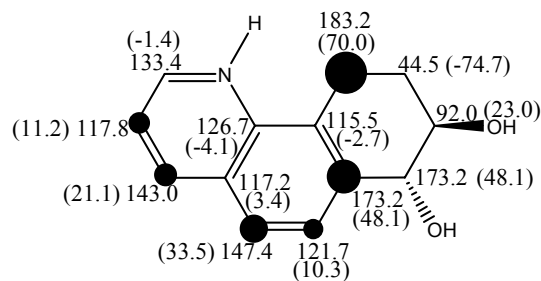

8H<sub>2</sub><sup>2+</sup>

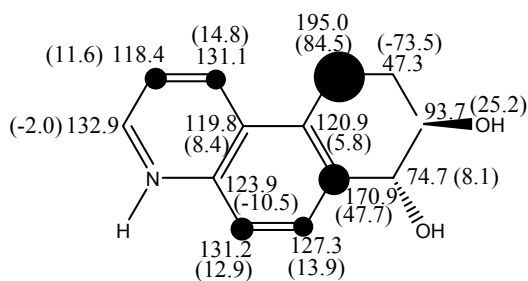

9H<sub>2</sub><sup>2+</sup>

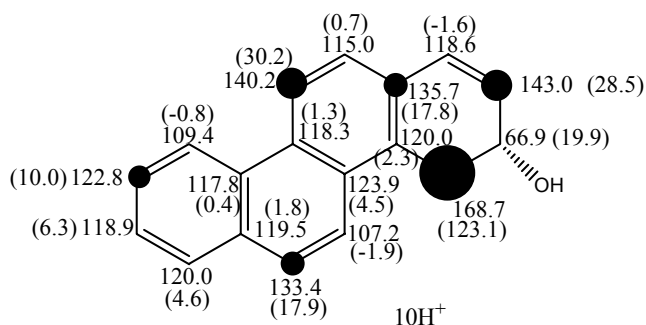

10H<sup>+</sup>

Electronic Supplementary Material for Organic & Biomolecular Chemistry  
 This journal is © The Royal Society of Chemistry 2005

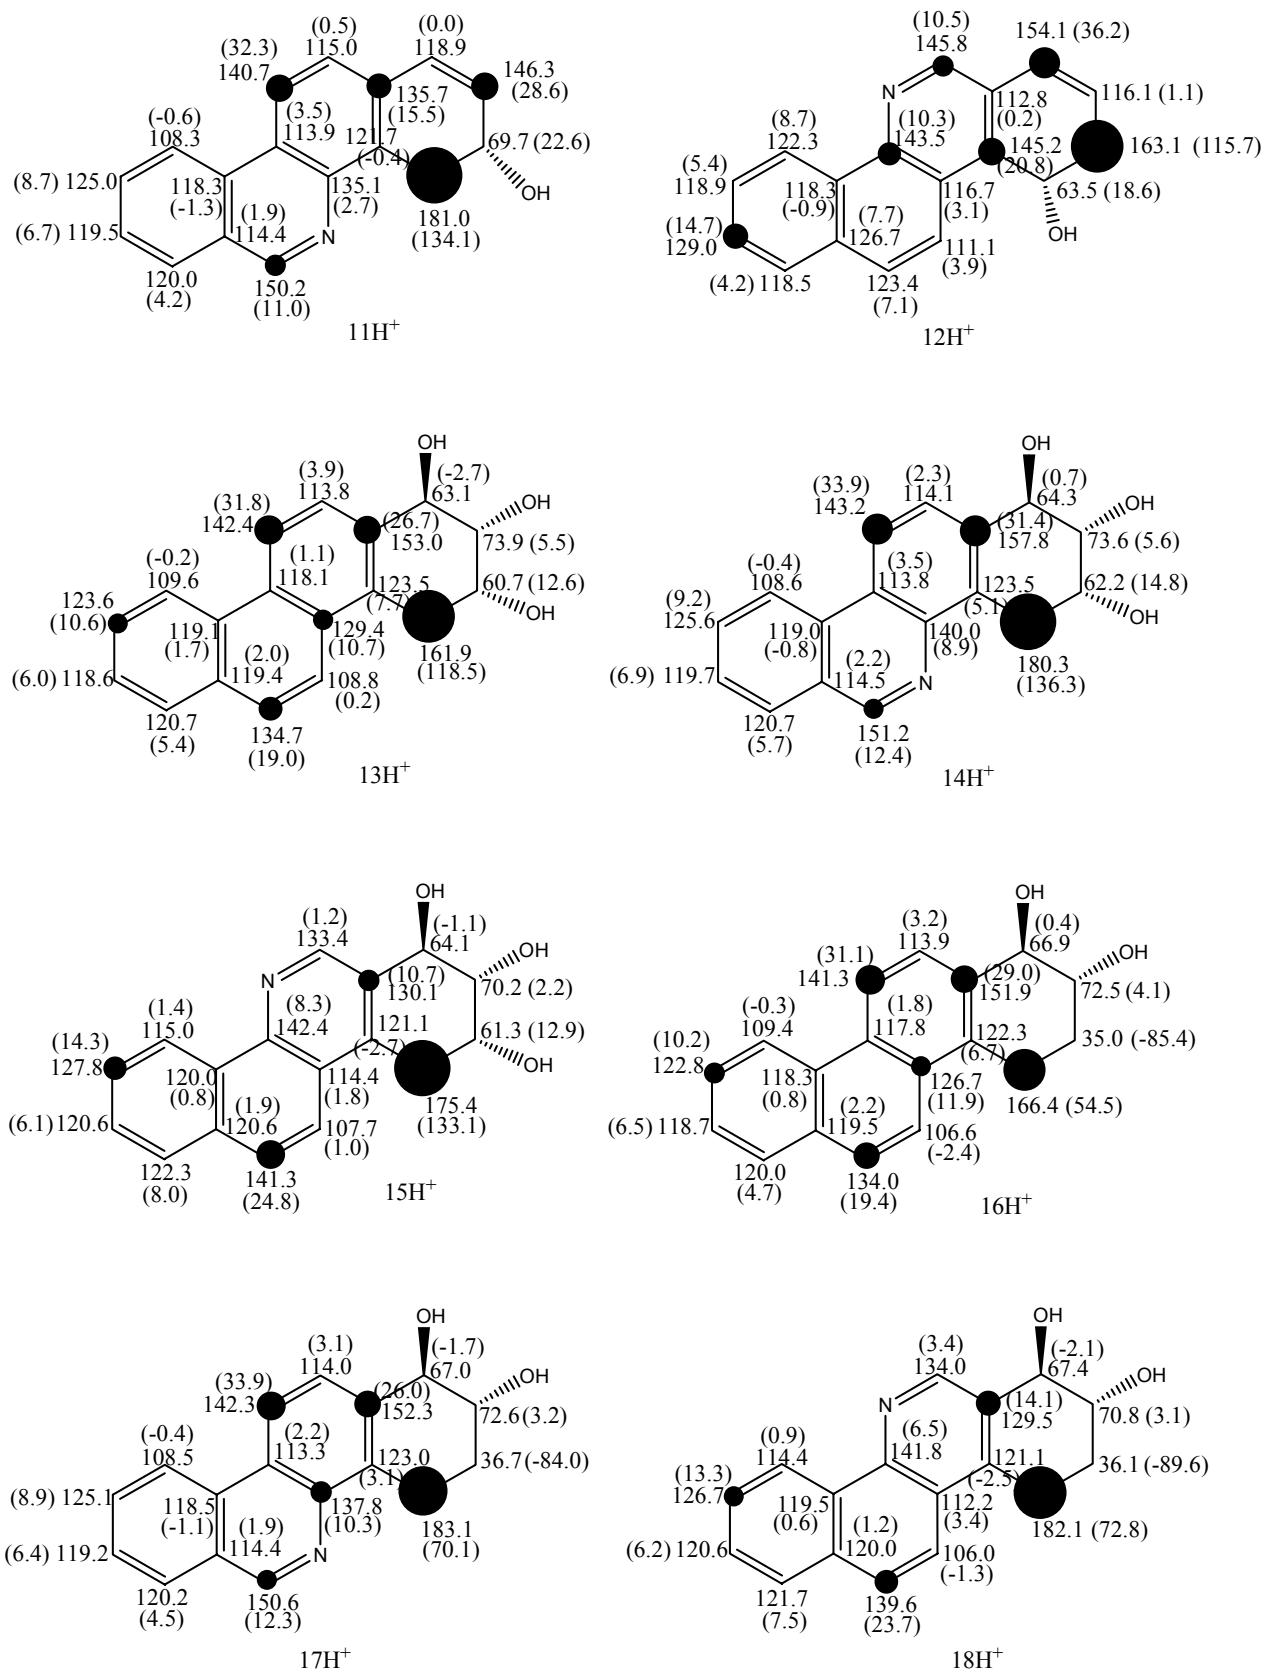

Electronic Supplementary Material for Organic & Biomolecular Chemistry  
 This journal is © The Royal Society of Chemistry 2005

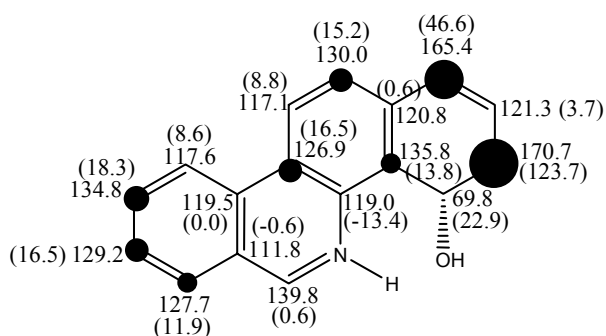

11H<sub>2</sub><sup>2+</sup>

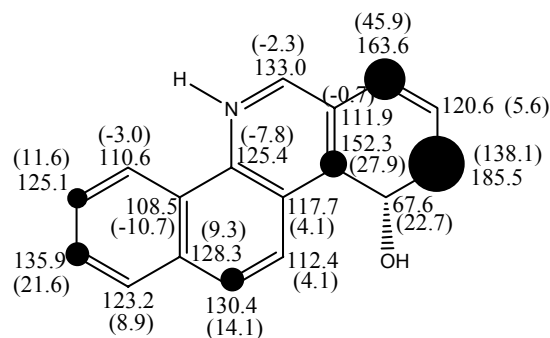

12H<sub>2</sub><sup>2+</sup>

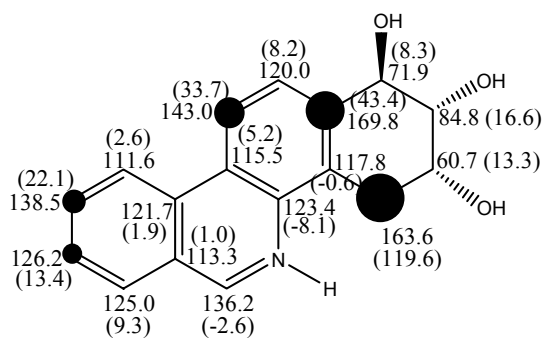

14H<sub>2</sub><sup>2+</sup>

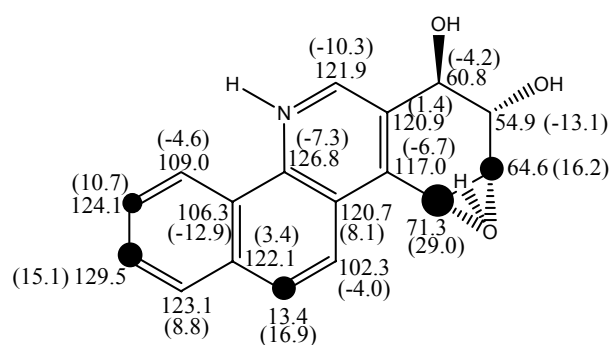

15H<sub>2</sub><sup>2+</sup>

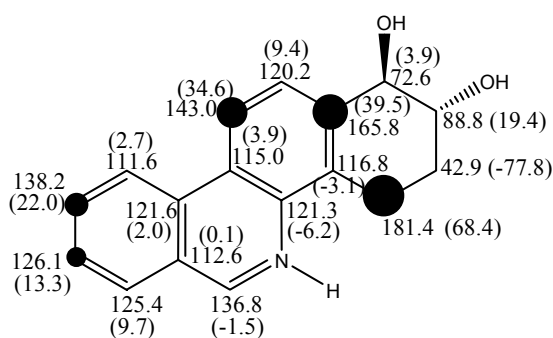

17H<sub>2</sub><sup>2+</sup>

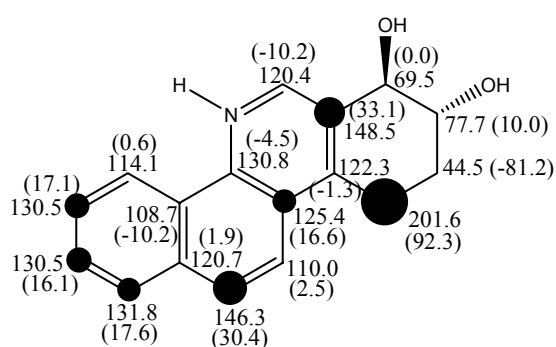

18H<sub>2</sub><sup>2+</sup>

**Figure S4.** Computed NICS values ( $\Delta$ NICS related to the neutral compound in parentheses).

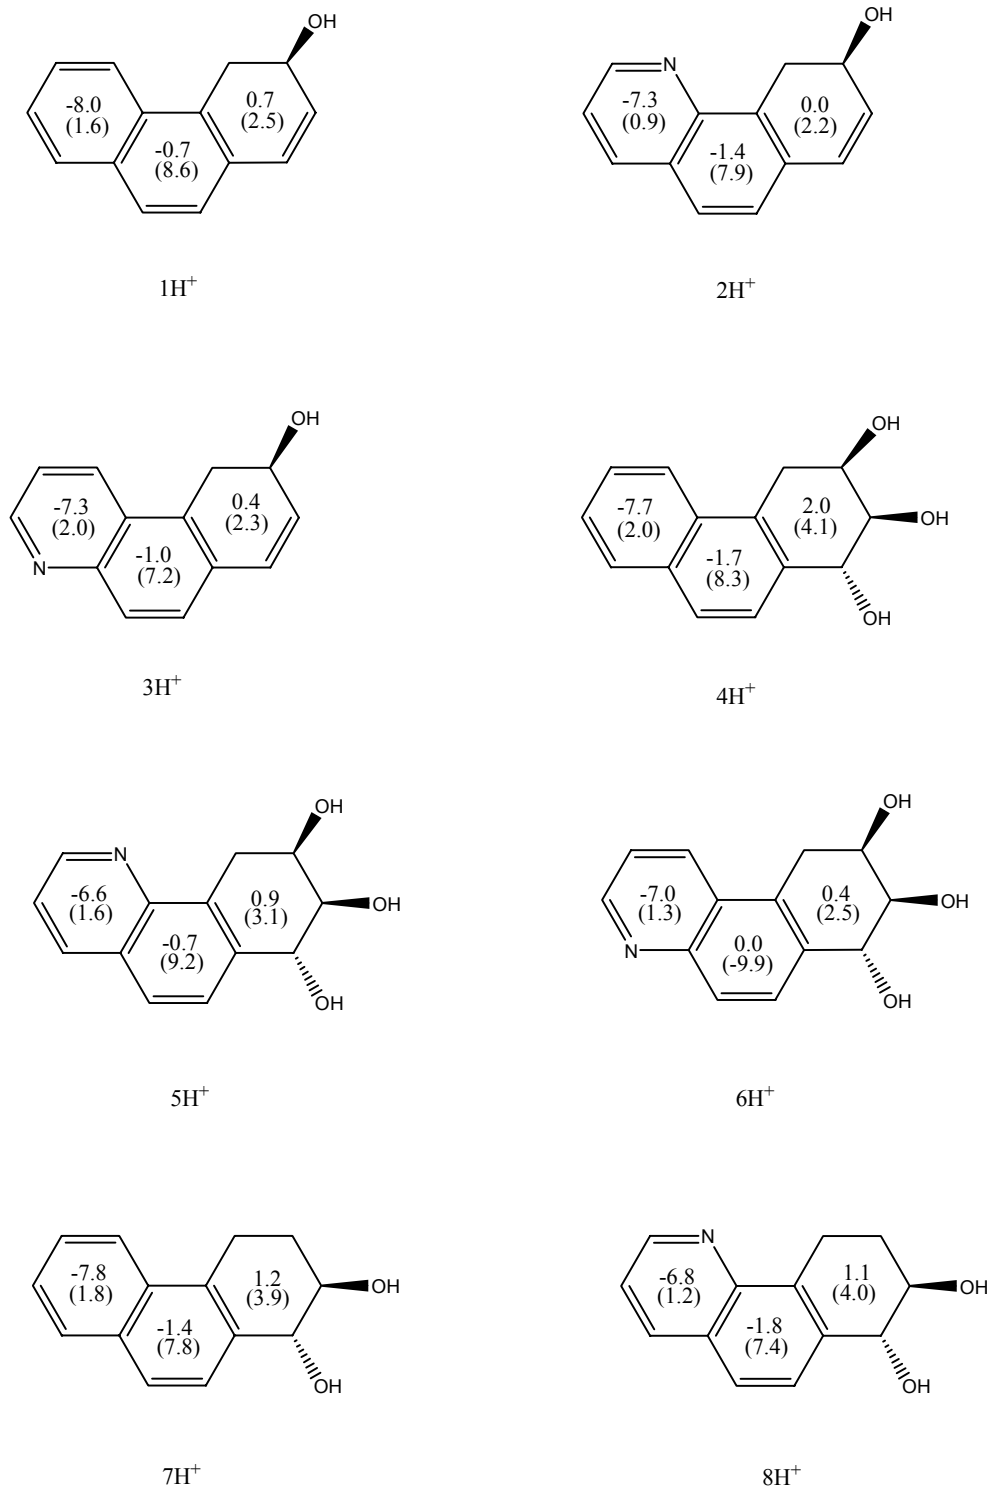

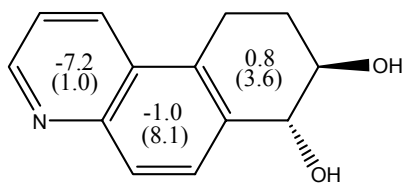

9H<sup>+</sup>

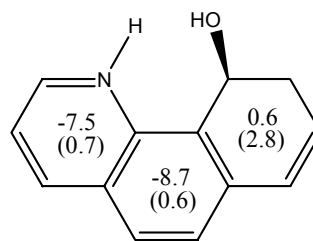

2H<sub>2</sub><sup>2+</sup>

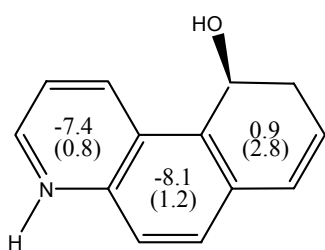

3H<sub>2</sub><sup>2+</sup>

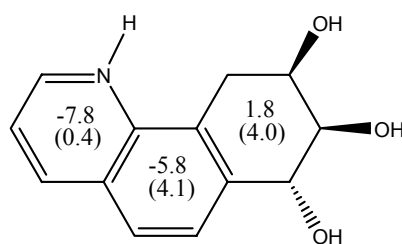

5H<sub>2</sub><sup>2+</sup>

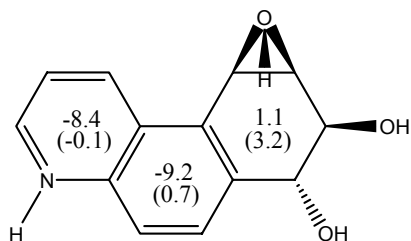

6H<sub>2</sub><sup>2+</sup>

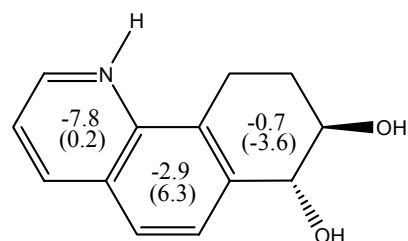

8H<sub>2</sub><sup>2+</sup>

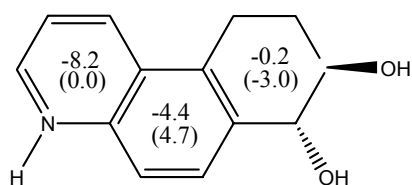

9H<sub>2</sub><sup>2+</sup>

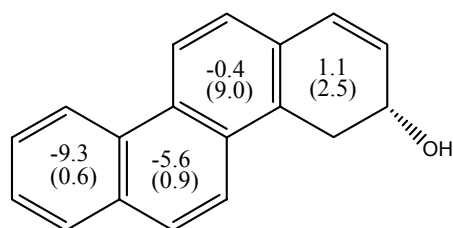

10H<sup>+</sup>



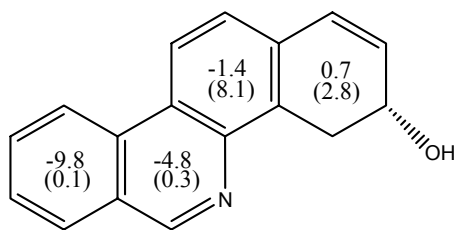

11H<sup>+</sup>

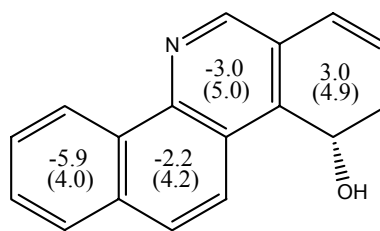

12H<sup>+</sup>

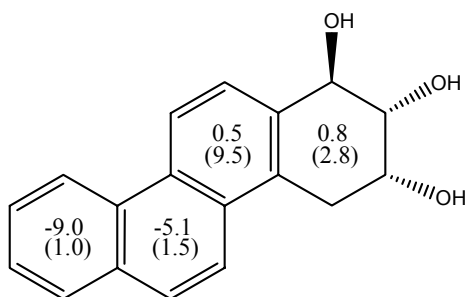

13H<sup>+</sup>

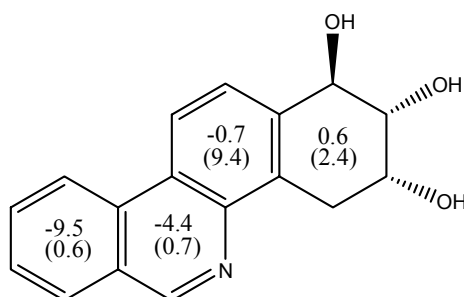

14H<sup>+</sup>

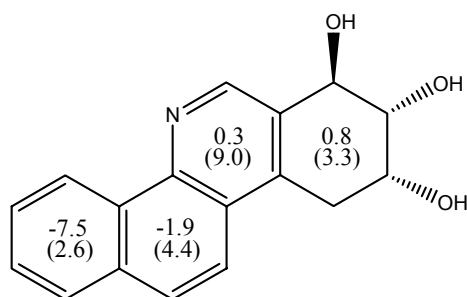

15H<sup>+</sup>

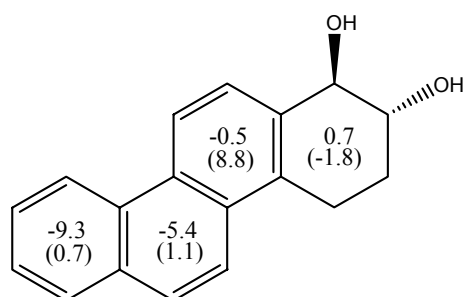

16H<sup>+</sup>

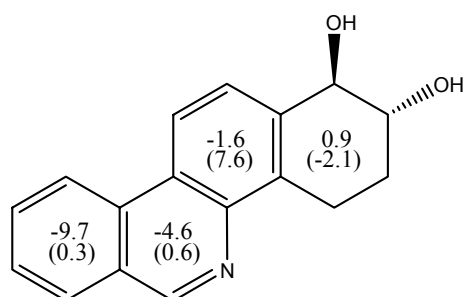

17H<sup>+</sup>

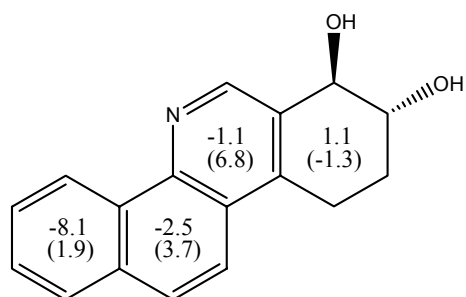

18H<sup>+</sup>

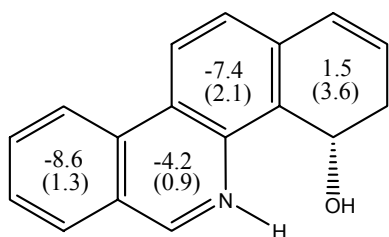

11H<sub>2</sub><sup>2+</sup>

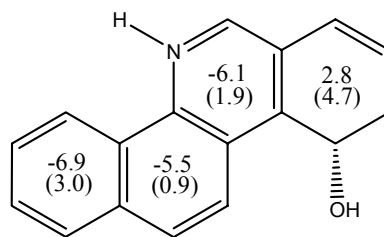

12H<sub>2</sub><sup>2+</sup>

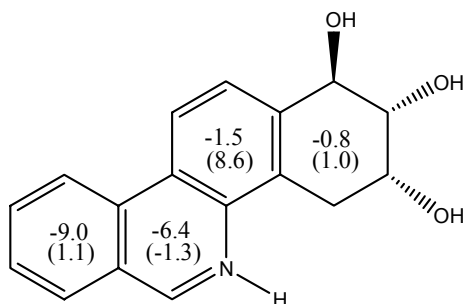

14H<sub>2</sub><sup>2+</sup>

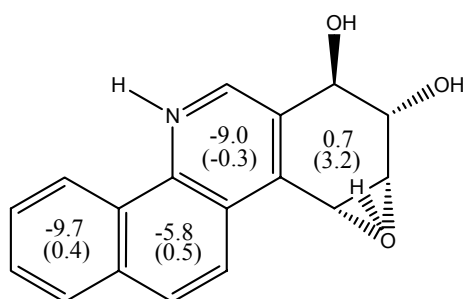

15H<sub>2</sub><sup>2+</sup>

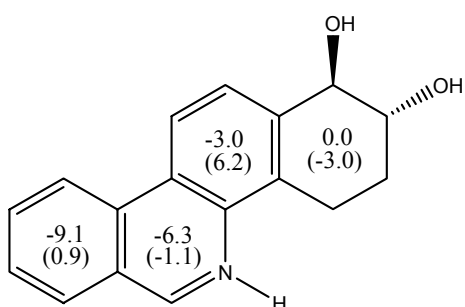

17H<sub>2</sub><sup>2+</sup>

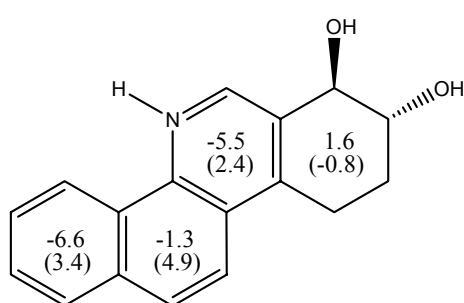

18H<sub>2</sub><sup>2+</sup>

**Figure S4.** Superimposed structures of the adducts of  $1\text{H}^+$  and  $2\text{H}^+$  with guanine. (a) N-7 adduct. (b) Exocyclic N-adduct.

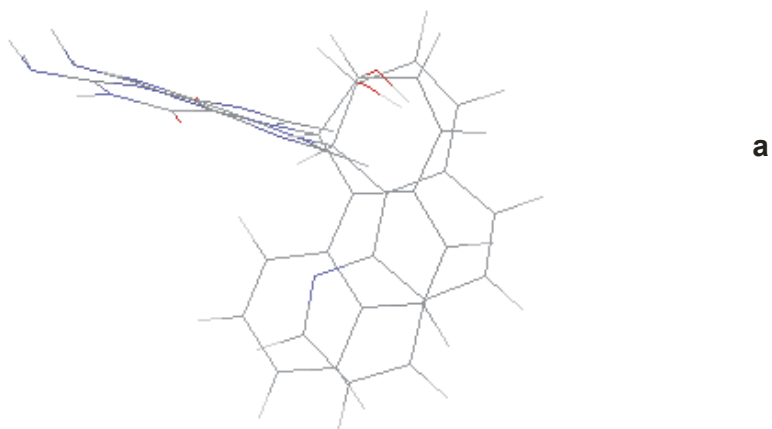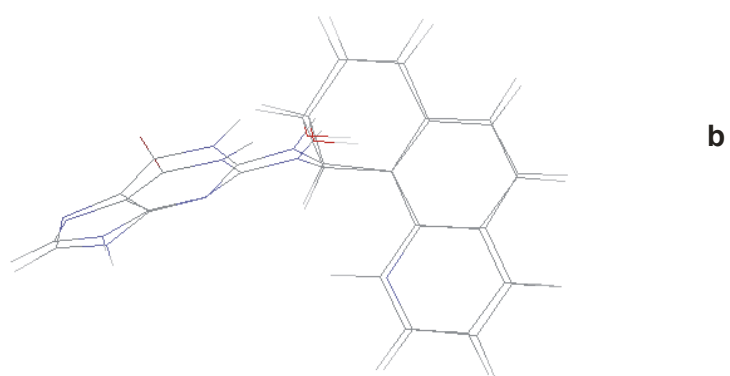

**Table S1.** Cartesian coordinates of the optimized structure for **1H<sup>+</sup>** (B3LYP/6-31G\*).

| Center<br>Number | Atomic<br>Number | Atomic<br>Type | Coordinates (Angstroms) |           |           |
|------------------|------------------|----------------|-------------------------|-----------|-----------|
|                  |                  |                | X                       | Y         | Z         |
| 1                | 6                | 0              | -0.911774               | 1.274140  | -0.045865 |
| 2                | 6                | 0              | -0.432625               | -0.104167 | -0.089540 |
| 3                | 6                | 0              | 1.013234                | -0.371357 | -0.043071 |
| 4                | 6                | 0              | 1.904872                | 0.743234  | 0.053457  |
| 5                | 6                | 0              | 1.372890                | 2.058116  | 0.088738  |
| 6                | 6                | 0              | 0.013023                | 2.321572  | 0.038880  |
| 7                | 6                | 0              | 3.305031                | 0.535711  | 0.101476  |
| 8                | 6                | 0              | 3.822707                | -0.744299 | 0.051786  |
| 9                | 6                | 0              | 2.947555                | -1.838794 | -0.052287 |
| 10               | 6                | 0              | 1.568155                | -1.656618 | -0.103313 |
| 11               | 6                | 0              | -1.372599               | -1.098512 | -0.123545 |
| 12               | 6                | 0              | -2.836814               | -0.850704 | -0.273562 |
| 13               | 8                | 0              | -3.640875               | -1.790663 | 0.408800  |
| 14               | 1                | 0              | -3.593608               | -1.609483 | 1.362450  |
| 15               | 6                | 0              | -3.248642               | 0.575443  | -0.110205 |
| 16               | 6                | 0              | -2.326674               | 1.560002  | -0.047148 |
| 17               | 1                | 0              | -0.341873               | 3.346640  | 0.073740  |
| 18               | 1                | 0              | 2.068717                | 2.890952  | 0.158380  |
| 19               | 1                | 0              | 3.962789                | 1.396847  | 0.177063  |
| 20               | 1                | 0              | 4.894930                | -0.906119 | 0.088484  |
| 21               | 1                | 0              | 3.350324                | -2.846048 | -0.097784 |
| 22               | 1                | 0              | 0.935207                | -2.532383 | -0.196066 |
| 23               | 1                | 0              | -1.097374               | -2.148507 | -0.090465 |
| 24               | 1                | 0              | -3.016555               | -1.070029 | -1.350378 |
| 25               | 1                | 0              | -4.315122               | 0.780726  | -0.100125 |
| 26               | 1                | 0              | -2.630462               | 2.600102  | 0.029502  |

**Table S2.** Cartesian coordinates of the optimized structure for  $2\text{H}^+$  (B3LYP/6-31G\*).

| Center<br>Number | Atomic<br>Number | Atomic<br>Type | Coordinates (Angstroms) |           |           |
|------------------|------------------|----------------|-------------------------|-----------|-----------|
|                  |                  |                | X                       | Y         | Z         |
| 1                | 6                | 0              | 0.883294                | 1.300273  | 0.029172  |
| 2                | 6                | 0              | -0.058616               | 2.342437  | -0.043422 |
| 3                | 6                | 0              | -1.414964               | 2.068758  | -0.074551 |
| 4                | 6                | 0              | -1.931069               | 0.742426  | -0.041568 |
| 5                | 6                | 0              | -1.023869               | -0.350743 | 0.032799  |
| 6                | 6                | 0              | 0.413927                | -0.070955 | 0.077413  |
| 7                | 6                | 0              | 1.328621                | -1.090060 | 0.118850  |
| 8                | 6                | 0              | 2.788197                | -0.843554 | 0.270095  |
| 9                | 8                | 0              | 3.613665                | -1.806287 | -0.343238 |
| 10               | 6                | 0              | 3.209430                | 0.579587  | 0.083240  |
| 11               | 6                | 0              | 2.298345                | 1.577642  | 0.020143  |
| 12               | 7                | 0              | -1.424188               | -1.629182 | 0.072362  |
| 13               | 6                | 0              | -2.733087               | -1.871311 | 0.036572  |
| 14               | 6                | 0              | -3.719282               | -0.865788 | -0.033797 |
| 15               | 6                | 0              | -3.316072               | 0.453190  | -0.073769 |
| 16               | 1                | 0              | 3.562495                | -1.697877 | -1.307531 |
| 17               | 1                | 0              | 0.286062                | 3.370992  | -0.078900 |
| 18               | 1                | 0              | -2.120064               | 2.895140  | -0.129269 |
| 19               | 1                | 0              | -4.038347               | 1.262881  | -0.130218 |
| 20               | 1                | 0              | -4.769196               | -1.137209 | -0.056031 |
| 21               | 1                | 0              | -3.024420               | -2.918670 | 0.065763  |
| 22               | 1                | 0              | 0.989815                | -2.122885 | 0.104073  |
| 23               | 1                | 0              | 2.931591                | -1.015413 | 1.364112  |
| 24               | 1                | 0              | 4.278069                | 0.773017  | 0.065981  |
| 25               | 1                | 0              | 2.614858                | 2.613172  | -0.065679 |

**Table S3.** Cartesian coordinates of the optimized structure for  $3\text{H}^+$  (B3LYP/6-31G\*).

| Center<br>Number | Atomic<br>Number | Atomic<br>Type | Coordinates (Angstroms) |           |           |
|------------------|------------------|----------------|-------------------------|-----------|-----------|
|                  |                  |                | X                       | Y         | Z         |
| 1                | 6                | 0              | -0.887256               | 1.271497  | -0.041503 |
| 2                | 6                | 0              | 0.052520                | 2.312539  | 0.038269  |
| 3                | 6                | 0              | 1.405691                | 2.036703  | 0.084889  |
| 4                | 6                | 0              | 1.917446                | 0.704008  | 0.050726  |
| 5                | 6                | 0              | 1.015436                | -0.391659 | -0.040070 |
| 6                | 6                | 0              | -0.424134               | -0.111233 | -0.085100 |
| 7                | 6                | 0              | -1.371530               | -1.099699 | -0.115321 |
| 8                | 6                | 0              | -2.830930               | -0.833756 | -0.268064 |
| 9                | 8                | 0              | -3.654913               | -1.777333 | 0.378959  |
| 10               | 6                | 0              | -3.229749               | 0.594732  | -0.099314 |
| 11               | 6                | 0              | -2.297314               | 1.571695  | -0.039411 |
| 12               | 6                | 0              | 1.581825                | -1.678135 | -0.096202 |
| 13               | 6                | 0              | 2.958762                | -1.808931 | -0.045611 |
| 14               | 6                | 0              | 3.762554                | -0.651483 | 0.053502  |
| 15               | 7                | 0              | 3.265119                | 0.572326  | 0.098572  |
| 16               | 1                | 0              | -3.631473               | -1.612899 | 1.336550  |
| 17               | 1                | 0              | -0.293875               | 3.340676  | 0.071444  |
| 18               | 1                | 0              | 2.137393                | 2.836875  | 0.150813  |
| 19               | 1                | 0              | 0.964167                | -2.566010 | -0.182600 |
| 20               | 1                | 0              | 4.845676                | -0.738285 | 0.094880  |
| 21               | 1                | 0              | 3.423678                | -2.788704 | -0.084607 |
| 22               | 1                | 0              | -1.104990               | -2.152292 | -0.083692 |
| 23               | 1                | 0              | -2.991019               | -1.028545 | -1.354630 |
| 24               | 1                | 0              | -4.294343               | 0.809547  | -0.088388 |
| 25               | 1                | 0              | -2.591673               | 2.614360  | 0.037825  |

**Table S4.** Cartesian coordinates of the optimized structure for  $4\text{H}^+$  (B3LYP/6-31G\*).

| Center<br>Number | Atomic<br>Number | Atomic<br>Type | Coordinates (Angstroms) |           |           |
|------------------|------------------|----------------|-------------------------|-----------|-----------|
|                  |                  |                | X                       | Y         | Z         |
| 1                | 6                | 0              | -0.563006               | -1.100155 | 0.035986  |
| 2                | 6                | 0              | 0.015423                | 0.212578  | 0.197838  |
| 3                | 6                | 0              | 1.471396                | 0.381968  | 0.120420  |
| 4                | 6                | 0              | 2.266653                | -0.769253 | -0.198184 |
| 5                | 6                | 0              | 1.629894                | -2.011668 | -0.396961 |
| 6                | 6                | 0              | 0.247686                | -2.179857 | -0.273864 |
| 7                | 6                | 0              | 3.679150                | -0.658164 | -0.304606 |
| 8                | 6                | 0              | 4.297993                | 0.554812  | -0.092158 |
| 9                | 6                | 0              | 3.517731                | 1.681314  | 0.233663  |
| 10               | 6                | 0              | 2.133614                | 1.598490  | 0.339768  |
| 11               | 6                | 0              | -0.844741               | 1.278427  | 0.335024  |
| 12               | 6                | 0              | -2.342375               | 1.199317  | 0.375329  |
| 13               | 6                | 0              | -2.862442               | -0.102861 | -0.259259 |
| 14               | 8                | 0              | -2.686777               | 0.049739  | -1.663181 |
| 15               | 1                | 0              | -3.409223               | -0.395129 | -2.131851 |
| 16               | 6                | 0              | -2.051079               | -1.292783 | 0.271576  |
| 17               | 8                | 0              | -2.303318               | -1.328280 | 1.673079  |
| 18               | 1                | 0              | -1.990882               | -2.170930 | 2.039552  |
| 19               | 8                | 0              | -2.903672               | 2.331529  | -0.241183 |
| 20               | 1                | 0              | -0.188054               | -3.163002 | -0.426417 |
| 21               | 1                | 0              | 2.245557                | -2.872470 | -0.648224 |
| 22               | 1                | 0              | 4.259118                | -1.542789 | -0.551412 |
| 23               | 1                | 0              | 5.376361                | 0.645378  | -0.169736 |
| 24               | 1                | 0              | 4.004663                | 2.635725  | 0.410114  |
| 25               | 1                | 0              | 1.580839                | 2.492163  | 0.607233  |
| 26               | 1                | 0              | -0.462723               | 2.294540  | 0.391298  |
| 27               | 1                | 0              | -2.637729               | 1.212074  | 1.434885  |
| 28               | 1                | 0              | -3.915213               | -0.239294 | 0.008538  |
| 29               | 1                | 0              | -2.384839               | -2.214836 | -0.223091 |
| 30               | 1                | 0              | -2.903123               | 2.141671  | -1.198047 |

**Table S5.** Cartesian coordinates of the optimized structure for  $5^+$  (B3LYP/6-31G\*).

| Center<br>Number | Atomic<br>Number | Atomic<br>Type | Coordinates (Angstroms) |           |           |
|------------------|------------------|----------------|-------------------------|-----------|-----------|
|                  |                  |                | X                       | Y         | Z         |
| 1                | 6                | 0              | -0.529541               | 0.899826  | 0.116178  |
| 2                | 6                | 0              | 0.188641                | 2.091040  | 0.154720  |
| 3                | 6                | 0              | 1.581792                | 2.068631  | 0.122328  |
| 4                | 6                | 0              | 2.329136                | 0.866437  | 0.039323  |
| 5                | 6                | 0              | 1.633849                | -0.374758 | -0.031823 |
| 6                | 6                | 0              | 0.164791                | -0.359156 | -0.016777 |
| 7                | 6                | 0              | -0.539024               | -1.520924 | -0.197572 |
| 8                | 8                | 0              | -2.429950               | -1.916056 | 1.100496  |
| 9                | 6                | 0              | -2.043175               | -1.580067 | -0.224285 |
| 10               | 6                | 0              | -2.647405               | -0.216716 | -0.620250 |
| 11               | 8                | 0              | -4.035974               | -0.216514 | -0.320983 |
| 12               | 1                | 0              | -4.546587               | -0.442843 | -1.114356 |
| 13               | 6                | 0              | -2.023579               | 0.895516  | 0.244299  |
| 14               | 8                | 0              | -2.532518               | 2.164635  | -0.074349 |
| 15               | 1                | 0              | -3.490546               | 2.136370  | 0.085930  |
| 16               | 7                | 0              | 2.261407                | -1.553838 | -0.122202 |
| 17               | 6                | 0              | 3.593790                | -1.550241 | -0.132228 |
| 18               | 6                | 0              | 4.382090                | -0.383277 | -0.056392 |
| 19               | 6                | 0              | 3.745681                | 0.837409  | 0.025518  |
| 20               | 1                | 0              | -0.348875               | 3.028935  | 0.225164  |
| 21               | 1                | 0              | 2.123958                | 3.010655  | 0.173537  |
| 22               | 1                | 0              | 4.307561                | 1.765809  | 0.078587  |
| 23               | 1                | 0              | 5.464000                | -0.458670 | -0.067902 |
| 24               | 1                | 0              | 4.070460                | -2.525025 | -0.205204 |
| 25               | 1                | 0              | 0.023192                | -2.443625 | -0.319250 |
| 26               | 1                | 0              | -2.367407               | -2.355827 | -0.934823 |
| 27               | 1                | 0              | -2.461568               | 0.004933  | -1.678912 |
| 28               | 1                | 0              | -2.244507               | 0.624177  | 1.292919  |
| 29               | 1                | 0              | -3.394268               | -1.766882 | 1.140180  |



**Table S6.** Cartesian coordinates of the optimized structure for **6H<sup>+</sup>** (B3LYP/6-31G\*).

| Center<br>Number | Atomic<br>Number | Atomic<br>Type | Coordinates (Angstroms) |           |           |
|------------------|------------------|----------------|-------------------------|-----------|-----------|
|                  |                  |                | X                       | Y         | Z         |
| 1                | 6                | 0              | -0.525854               | 0.871375  | 0.128010  |
| 2                | 6                | 0              | 0.193760                | 2.060643  | 0.137965  |
| 3                | 6                | 0              | 1.583325                | 2.032481  | 0.067938  |
| 4                | 6                | 0              | 2.324685                | 0.819548  | 0.000978  |
| 5                | 6                | 0              | 1.631479                | -0.422541 | -0.022532 |
| 6                | 6                | 0              | 0.160802                | -0.400433 | -0.018242 |
| 7                | 6                | 0              | -0.581214               | -1.527303 | -0.252749 |
| 8                | 8                | 0              | -2.475938               | -1.945811 | 1.032279  |
| 9                | 6                | 0              | -2.087512               | -1.561244 | -0.278272 |
| 10               | 6                | 0              | -2.672920               | -0.177395 | -0.618687 |
| 11               | 8                | 0              | -4.057238               | -0.166960 | -0.305000 |
| 12               | 6                | 0              | -2.017024               | 0.886534  | 0.281701  |
| 13               | 8                | 0              | -2.511190               | 2.173716  | 0.021816  |
| 14               | 6                | 0              | 2.417600                | -1.587720 | -0.044485 |
| 15               | 6                | 0              | 3.796948                | -1.466072 | -0.058467 |
| 16               | 6                | 0              | 4.383701                | -0.180075 | -0.050791 |
| 17               | 7                | 0              | 3.676640                | 0.934936  | -0.019537 |
| 18               | 1                | 0              | 1.969309                | -2.575547 | -0.031281 |
| 19               | 1                | 0              | -4.581533               | -0.327985 | -1.105325 |
| 20               | 1                | 0              | -3.465939               | 2.156042  | 0.201714  |
| 21               | 1                | 0              | -0.341578               | 2.999561  | 0.210056  |
| 22               | 1                | 0              | 2.159191                | 2.953962  | 0.083735  |
| 23               | 1                | 0              | 5.465476                | -0.071300 | -0.065909 |
| 24               | 1                | 0              | 4.429185                | -2.348133 | -0.069415 |
| 25               | 1                | 0              | -0.081439               | -2.475333 | -0.430284 |
| 26               | 1                | 0              | -2.423488               | -2.303562 | -1.018301 |
| 27               | 1                | 0              | -2.492886               | 0.081109  | -1.669808 |
| 28               | 1                | 0              | -2.226718               | 0.575780  | 1.321637  |
| 29               | 1                | 0              | -3.437790               | -1.783487 | 1.082974  |

**Table S7.** Cartesian coordinates of the optimized structure for **7H<sup>+</sup>** (B3LYP/6-31G\*).

| Center<br>Number | Atomic<br>Number | Atomic<br>Type | Coordinates (Angstroms) |           |           |
|------------------|------------------|----------------|-------------------------|-----------|-----------|
|                  |                  |                | X                       | Y         | Z         |
| 1                | 6                | 0              | 0.770560                | 0.707860  | -0.153877 |
| 2                | 6                | 0              | -0.006804               | -0.511540 | -0.099196 |
| 3                | 6                | 0              | -1.474477               | -0.434172 | -0.034759 |
| 4                | 6                | 0              | -2.078413               | 0.866040  | 0.005285  |
| 5                | 6                | 0              | -1.253647               | 2.011136  | -0.030841 |
| 6                | 6                | 0              | 0.138105                | 1.940572  | -0.108499 |
| 7                | 6                | 0              | -3.490052               | 1.001126  | 0.074549  |
| 8                | 6                | 0              | -4.295399               | -0.117825 | 0.102865  |
| 9                | 6                | 0              | -3.703328               | -1.393780 | 0.063036  |
| 10               | 6                | 0              | -2.322371               | -1.550625 | -0.001736 |
| 11               | 6                | 0              | 0.667994                | -1.713097 | -0.097232 |
| 12               | 6                | 0              | 2.143015                | -1.856816 | -0.105504 |
| 13               | 6                | 0              | 2.872297                | -0.601040 | 0.375638  |
| 14               | 8                | 0              | 4.229805                | -0.758356 | 0.064097  |
| 15               | 1                | 0              | 4.682412                | 0.082237  | 0.249959  |
| 16               | 6                | 0              | 2.276425                | 0.635772  | -0.314310 |
| 17               | 8                | 0              | 2.942816                | 1.818565  | 0.086139  |
| 18               | 1                | 0              | 2.801702                | 1.953698  | 1.039771  |
| 19               | 1                | 0              | 2.465690                | -2.064819 | -1.142662 |
| 20               | 1                | 0              | 0.733673                | 2.845329  | -0.156928 |
| 21               | 1                | 0              | -1.729611               | 2.989004  | -0.008395 |
| 22               | 1                | 0              | -3.921382               | 1.997550  | 0.104226  |
| 23               | 1                | 0              | -5.374710               | -0.020369 | 0.154251  |
| 24               | 1                | 0              | -4.334300               | -2.277295 | 0.082108  |
| 25               | 1                | 0              | -1.922702               | -2.558232 | -0.029754 |
| 26               | 1                | 0              | 0.098872                | -2.638810 | -0.090924 |
| 27               | 1                | 0              | 2.445787                | -2.741137 | 0.467207  |
| 28               | 1                | 0              | 2.716633                | -0.493028 | 1.465757  |
| 29               | 1                | 0              | 2.493537                | 0.542537  | -1.389015 |

**Table S8.** Cartesian coordinates of the optimized structure for **8H<sup>+</sup>** (B3LYP/6-31G\*).

| Center<br>Number | Atomic<br>Number | Atomic<br>Type | Coordinates (Angstroms) |           |           |
|------------------|------------------|----------------|-------------------------|-----------|-----------|
|                  |                  |                | X                       | Y         | Z         |
| 1                | 6                | 0              | -0.756806               | 0.725637  | 0.161510  |
| 2                | 6                | 0              | -0.129459               | 1.965848  | 0.070385  |
| 3                | 6                | 0              | 1.258387                | 2.040343  | -0.020426 |
| 4                | 6                | 0              | 2.088640                | 0.890857  | -0.027942 |
| 5                | 6                | 0              | 1.484531                | -0.397510 | 0.044919  |
| 6                | 6                | 0              | 0.024271                | -0.481498 | 0.121946  |
| 7                | 6                | 0              | -0.603456               | -1.708471 | 0.106039  |
| 8                | 1                | 0              | -2.387939               | -2.032950 | 1.174078  |
| 9                | 6                | 0              | -2.076023               | -1.868108 | 0.126421  |
| 10               | 6                | 0              | -2.806825               | -0.609320 | -0.388685 |
| 11               | 8                | 0              | -4.187515               | -0.632273 | -0.095688 |
| 12               | 6                | 0              | -2.247242               | 0.624908  | 0.336898  |
| 13               | 8                | 0              | -2.855180               | 1.811117  | -0.098204 |
| 14               | 7                | 0              | 2.194948                | -1.535075 | 0.036154  |
| 15               | 6                | 0              | 3.520338                | -1.438681 | -0.035905 |
| 16               | 6                | 0              | 4.222694                | -0.216479 | -0.106313 |
| 17               | 6                | 0              | 3.502399                | 0.958525  | -0.105314 |
| 18               | 1                | 0              | -4.671928               | -1.069564 | -0.812858 |
| 19               | 1                | 0              | -3.814498               | 1.685311  | 0.004395  |
| 20               | 1                | 0              | -0.733780               | 2.865006  | 0.076264  |
| 21               | 1                | 0              | 1.730513                | 3.018651  | -0.081866 |
| 22               | 1                | 0              | 3.995956                | 1.924716  | -0.162898 |
| 23               | 1                | 0              | 5.305835                | -0.217341 | -0.162579 |
| 24               | 1                | 0              | 4.066018                | -2.379511 | -0.039464 |
| 25               | 1                | 0              | 0.031313                | -2.591317 | 0.062325  |
| 26               | 1                | 0              | -2.371737               | -2.776310 | -0.411916 |
| 27               | 1                | 0              | -2.628954               | -0.489074 | -1.467023 |
| 28               | 1                | 0              | -2.432574               | 0.460839  | 1.418399  |

**Table S9.** Cartesian coordinates of the optimized structure for **9H<sup>+</sup>** (B3LYP/6-31G\*).

| Center<br>Number | Atomic<br>Number | Atomic<br>Type | Coordinates (Angstroms) |           |           |
|------------------|------------------|----------------|-------------------------|-----------|-----------|
|                  |                  |                | X                       | Y         | Z         |
| 1                | 6                | 0              | -0.756806               | 0.725637  | 0.161510  |
| 2                | 6                | 0              | -0.129459               | 1.965848  | 0.070385  |
| 3                | 6                | 0              | 1.258387                | 2.040343  | -0.020426 |
| 4                | 6                | 0              | 2.088640                | 0.890857  | -0.027942 |
| 5                | 6                | 0              | 1.484531                | -0.397510 | 0.044919  |
| 6                | 6                | 0              | 0.024271                | -0.481498 | 0.121946  |
| 7                | 6                | 0              | -0.603456               | -1.708471 | 0.106039  |
| 8                | 1                | 0              | -2.387939               | -2.032950 | 1.174078  |
| 9                | 6                | 0              | -2.076023               | -1.868108 | 0.126421  |
| 10               | 6                | 0              | -2.806825               | -0.609320 | -0.388685 |
| 11               | 8                | 0              | -4.187515               | -0.632273 | -0.095688 |
| 12               | 6                | 0              | -2.247242               | 0.624908  | 0.336898  |
| 13               | 8                | 0              | -2.855180               | 1.811117  | -0.098204 |
| 14               | 7                | 0              | 2.194948                | -1.535075 | 0.036154  |
| 15               | 6                | 0              | 3.520338                | -1.438681 | -0.035905 |
| 16               | 6                | 0              | 4.222694                | -0.216479 | -0.106313 |
| 17               | 6                | 0              | 3.502399                | 0.958525  | -0.105314 |
| 18               | 1                | 0              | -4.671928               | -1.069564 | -0.812858 |
| 19               | 1                | 0              | -3.814498               | 1.685311  | 0.004395  |
| 20               | 1                | 0              | -0.733780               | 2.865006  | 0.076264  |
| 21               | 1                | 0              | 1.730513                | 3.018651  | -0.081866 |
| 22               | 1                | 0              | 3.995956                | 1.924716  | -0.162898 |
| 23               | 1                | 0              | 5.305835                | -0.217341 | -0.162579 |
| 24               | 1                | 0              | 4.066018                | -2.379511 | -0.039464 |
| 25               | 1                | 0              | 0.031313                | -2.591317 | 0.062325  |
| 26               | 1                | 0              | -2.371737               | -2.776310 | -0.411916 |
| 27               | 1                | 0              | -2.628954               | -0.489074 | -1.467023 |
| 28               | 1                | 0              | -2.432574               | 0.460839  | 1.418399  |

**Table S10.** Cartesian coordinates of the optimized structure for **10H<sup>+</sup>** (B3LYP/6-31G\*).

| Center<br>Number | Atomic<br>Number | Atomic<br>Type | Coordinates (Angstroms) |           |           |
|------------------|------------------|----------------|-------------------------|-----------|-----------|
|                  |                  |                | X                       | Y         | Z         |
| 1                | 6                | 0              | 0.842743                | 0.625517  | -0.008363 |
| 2                | 6                | 0              | -0.105643               | -0.440253 | -0.081499 |
| 3                | 6                | 0              | -1.540904               | -0.116544 | -0.105659 |
| 4                | 6                | 0              | -1.971973               | 1.277900  | -0.072444 |
| 5                | 6                | 0              | -1.002972               | 2.272755  | -0.015579 |
| 6                | 6                | 0              | 0.351730                | 1.948158  | 0.015960  |
| 7                | 6                | 0              | -3.377739               | 1.613199  | -0.052614 |
| 8                | 6                | 0              | -4.333732               | 0.662861  | -0.089253 |
| 9                | 6                | 0              | -3.975616               | -0.781201 | -0.232661 |
| 10               | 6                | 0              | -2.516298               | -1.076397 | -0.108385 |
| 11               | 8                | 0              | -4.783594               | -1.672807 | 0.513414  |
| 12               | 6                | 0              | 0.362121                | -1.769000 | -0.147392 |
| 13               | 6                | 0              | 1.711709                | -2.045062 | -0.119012 |
| 14               | 6                | 0              | 2.691721                | -1.023907 | -0.032098 |
| 15               | 6                | 0              | 2.268900                | 0.342113  | 0.023392  |
| 16               | 6                | 0              | 3.266652                | 1.338476  | 0.108218  |
| 17               | 6                | 0              | 4.608424                | 1.000392  | 0.135029  |
| 18               | 6                | 0              | 5.019439                | -0.347066 | 0.078410  |
| 19               | 6                | 0              | 4.072230                | -1.344344 | -0.004047 |
| 20               | 1                | 0              | 3.002420                | 2.388704  | 0.156635  |
| 21               | 1                | 0              | 5.354212                | 1.786671  | 0.200925  |
| 22               | 1                | 0              | 6.076285                | -0.592871 | 0.100150  |
| 23               | 1                | 0              | 4.368959                | -2.388399 | -0.048563 |
| 24               | 1                | 0              | 2.043663                | -3.078734 | -0.168178 |
| 25               | 1                | 0              | -0.331363               | -2.597419 | -0.229442 |
| 26               | 1                | 0              | -2.283327               | -2.135379 | -0.057642 |
| 27               | 1                | 0              | -4.200107               | -1.035327 | -1.291466 |
| 28               | 1                | 0              | -5.391930               | 0.905633  | -0.066173 |
| 29               | 1                | 0              | -3.642228               | 2.664680  | 0.015403  |
| 30               | 1                | 0              | -1.302703               | 3.315580  | 0.012742  |
| 31               | 1                | 0              | 1.056463                | 2.770806  | 0.060756  |
| 32               | 1                | 0              | -4.706340               | -1.447066 | 1.455511  |

**Table S11.** Cartesian coordinates of the optimized structure for **11H<sup>+</sup>** (B3LYP/6-31G\*).

| Center<br>Number | Atomic<br>Number | Atomic<br>Type | Coordinates (Angstroms) |           |           |
|------------------|------------------|----------------|-------------------------|-----------|-----------|
|                  |                  |                | X                       | Y         | Z         |
| 1                | 6                | 0              | 0.853138                | 0.688992  | 0.001570  |
| 2                | 6                | 0              | -0.080430               | -0.376721 | -0.056075 |
| 3                | 6                | 0              | -1.511346               | -0.074138 | -0.087116 |
| 4                | 6                | 0              | -1.967116               | 1.302812  | -0.042561 |
| 5                | 6                | 0              | -1.007557               | 2.317003  | 0.014577  |
| 6                | 6                | 0              | 0.349334                | 2.012465  | 0.031864  |
| 7                | 6                | 0              | -3.380854               | 1.595433  | -0.019506 |
| 8                | 6                | 0              | -4.302988               | 0.609464  | -0.070246 |
| 9                | 6                | 0              | -3.899494               | -0.820975 | -0.249369 |
| 10               | 6                | 0              | -2.439522               | -1.081778 | -0.112983 |
| 11               | 8                | 0              | -4.718530               | -1.765048 | 0.405830  |
| 12               | 7                | 0              | 0.272509                | -1.683429 | -0.093783 |
| 13               | 6                | 0              | 1.556521                | -1.973829 | -0.073167 |
| 14               | 6                | 0              | 2.609107                | -1.016577 | -0.021349 |
| 15               | 6                | 0              | 2.265313                | 0.368102  | 0.018845  |
| 16               | 6                | 0              | 3.308046                | 1.316056  | 0.073076  |
| 17               | 6                | 0              | 4.629009                | 0.900538  | 0.085396  |
| 18               | 6                | 0              | 4.964819                | -0.469114 | 0.044862  |
| 19               | 6                | 0              | 3.965432                | -1.418459 | -0.007925 |
| 20               | 1                | 0              | 3.092792                | 2.378671  | 0.105402  |
| 21               | 1                | 0              | 5.420256                | 1.643025  | 0.126748  |
| 22               | 1                | 0              | 6.007617                | -0.769546 | 0.055533  |
| 23               | 1                | 0              | 4.204488                | -2.477791 | -0.039565 |
| 24               | 1                | 0              | 1.810424                | -3.033147 | -0.099024 |
| 25               | 1                | 0              | -2.114086               | -2.118465 | -0.091535 |
| 26               | 1                | 0              | -4.068101               | -1.018495 | -1.333872 |
| 27               | 1                | 0              | -5.369101               | 0.814929  | -0.045287 |
| 28               | 1                | 0              | -3.683527               | 2.635414  | 0.064173  |
| 29               | 1                | 0              | -1.323137               | 3.354962  | 0.049459  |
| 30               | 1                | 0              | 1.050276                | 2.840180  | 0.073755  |
| 31               | 1                | 0              | -4.655698               | -1.620983 | 1.364690  |

**Table S12.** Cartesian coordinates of the optimized structure for **12H<sup>+</sup>** (B3LYP/6-31G\*).

| Center<br>Number | Atomic<br>Number | Atomic<br>Type | Coordinates (Angstroms) |           |           |
|------------------|------------------|----------------|-------------------------|-----------|-----------|
|                  |                  |                | X                       | Y         | Z         |
| 1                | 6                | 0              | -0.654931               | -0.664231 | -0.005657 |
| 2                | 7                | 0              | -0.267327               | -1.976247 | 0.061938  |
| 3                | 6                | 0              | 1.002815                | -2.257349 | 0.043174  |
| 4                | 6                | 0              | 2.034062                | -1.260152 | -0.037485 |
| 5                | 6                | 0              | 1.652238                | 0.114056  | -0.096552 |
| 6                | 6                | 0              | 0.289066                | 0.432209  | -0.094772 |
| 7                | 6                | 0              | -0.215150               | 1.780411  | -0.186895 |
| 8                | 1                | 0              | 0.487698                | 2.601476  | -0.241609 |
| 9                | 6                | 0              | -1.553016               | 2.019340  | -0.182776 |
| 10               | 6                | 0              | -2.514400               | 0.956627  | -0.079941 |
| 11               | 6                | 0              | -2.059295               | -0.398051 | 0.011397  |
| 12               | 6                | 0              | -3.009109               | -1.449794 | 0.109787  |
| 13               | 6                | 0              | -4.359994               | -1.166585 | 0.118852  |
| 14               | 6                | 0              | -4.805111               | 0.168066  | 0.028223  |
| 15               | 6                | 0              | -3.896185               | 1.213109  | -0.070715 |
| 16               | 6                | 0              | 2.749576                | 1.164279  | -0.218848 |
| 17               | 8                | 0              | 2.593640                | 2.292507  | 0.630988  |
| 18               | 6                | 0              | 4.150613                | 0.633368  | -0.134096 |
| 19               | 6                | 0              | 4.443081                | -0.691892 | -0.081026 |
| 20               | 6                | 0              | 3.376592                | -1.634768 | -0.038510 |
| 21               | 1                | 0              | -2.648957               | -2.469249 | 0.175709  |
| 22               | 1                | 0              | -5.083299               | -1.972159 | 0.194918  |
| 23               | 1                | 0              | -5.870005               | 0.380873  | 0.035919  |
| 24               | 1                | 0              | -4.246784               | 2.238691  | -0.140695 |
| 25               | 1                | 0              | -1.920701               | 3.038871  | -0.257854 |
| 26               | 1                | 0              | 2.661786                | 1.579899  | -1.239643 |
| 27               | 1                | 0              | 4.930743                | 1.390146  | -0.126378 |
| 28               | 1                | 0              | 5.469440                | -1.041937 | -0.043211 |
| 29               | 1                | 0              | 3.617031                | -2.694617 | 0.018387  |
| 30               | 1                | 0              | 1.284361                | -3.309655 | 0.081951  |
| 31               | 1                | 0              | 2.655740                | 1.999477  | 1.556058  |

**Table S13.** Cartesian coordinates of the optimized structure for **13H<sup>+</sup>** (B3LYP/6-31G\*).

| Center<br>Number | Atomic<br>Number | Atomic<br>Type | Coordinates (Angstroms) |           |           |
|------------------|------------------|----------------|-------------------------|-----------|-----------|
|                  |                  |                | X                       | Y         | Z         |
| 1                | 6                | 0              | -1.348479               | 0.517927  | -0.026370 |
| 2                | 6                | 0              | -0.525567               | -0.651694 | -0.025425 |
| 3                | 6                | 0              | 0.939249                | -0.488438 | -0.002202 |
| 4                | 6                | 0              | 1.512324                | 0.837063  | -0.171069 |
| 5                | 6                | 0              | 0.680799                | 1.933439  | -0.196907 |
| 6                | 6                | 0              | -0.710517               | 1.767620  | -0.108953 |
| 7                | 6                | 0              | 2.999250                | 0.985045  | -0.312849 |
| 8                | 6                | 0              | 3.729230                | 0.021632  | 0.636114  |
| 9                | 6                | 0              | 3.277378                | -1.422705 | 0.351823  |
| 10               | 6                | 0              | 1.774919                | -1.530357 | 0.295821  |
| 11               | 8                | 0              | 3.740704                | -1.836447 | -0.925879 |
| 12               | 6                | 0              | -1.136591               | -1.919292 | -0.059428 |
| 13               | 6                | 0              | -2.511536               | -2.039961 | -0.048511 |
| 14               | 6                | 0              | -3.371321               | -0.914635 | -0.000670 |
| 15               | 6                | 0              | -2.799119               | 0.397412  | 0.013100  |
| 16               | 6                | 0              | -3.678294               | 1.499848  | 0.066199  |
| 17               | 6                | 0              | -5.050065               | 1.313288  | 0.097842  |
| 18               | 6                | 0              | -5.609557               | 0.019343  | 0.076518  |
| 19               | 6                | 0              | -4.779545               | -1.079202 | 0.027858  |
| 20               | 1                | 0              | -3.297504               | 2.514584  | 0.092428  |
| 21               | 1                | 0              | -5.703552               | 2.179313  | 0.141006  |
| 22               | 1                | 0              | -6.687307               | -0.105808 | 0.100078  |
| 23               | 1                | 0              | -5.189918               | -2.084887 | 0.012478  |
| 24               | 1                | 0              | -2.956829               | -3.030829 | -0.082781 |
| 25               | 1                | 0              | -0.537760               | -2.820109 | -0.127166 |
| 26               | 1                | 0              | 1.363914                | -2.511207 | 0.513457  |
| 27               | 1                | 0              | 3.659092                | -2.093267 | 1.137652  |
| 28               | 1                | 0              | 3.508374                | 0.305888  | 1.672883  |
| 29               | 1                | 0              | 3.260230                | 0.667575  | -1.337799 |
| 30               | 1                | 0              | 1.108432                | 2.924459  | -0.288617 |
| 31               | 1                | 0              | -1.315754               | 2.667239  | -0.138144 |
| 32               | 1                | 0              | 4.679164                | -1.568916 | -0.963691 |
| 33               | 8                | 0              | 5.116344                | 0.146707  | 0.345118  |
| 34               | 8                | 0              | 3.367123                | 2.323122  | -0.085769 |
| 35               | 1                | 0              | 5.634999                | 0.030298  | 1.156618  |
| 36               | 1                | 0              | 4.325686                | 2.380598  | -0.233486 |



**Table S14.** Cartesian coordinates of the optimized structure for **14H<sup>+</sup>** (B3LYP/6-31G\*).

| Center<br>Number | Atomic<br>Number | Atomic<br>Type | Coordinates (Angstroms) |           |           |
|------------------|------------------|----------------|-------------------------|-----------|-----------|
|                  |                  |                | X                       | Y         | Z         |
| 1                | 6                | 0              | 1.354056                | 0.582674  | 0.034465  |
| 2                | 6                | 0              | 0.542819                | -0.581347 | -0.050486 |
| 3                | 6                | 0              | -0.917376               | -0.438629 | -0.029735 |
| 4                | 6                | 0              | -1.514888               | 0.870203  | 0.093396  |
| 5                | 6                | 0              | -0.689290               | 1.977837  | 0.153554  |
| 6                | 6                | 0              | 0.704061                | 1.829450  | 0.132152  |
| 7                | 6                | 0              | -3.020527               | 1.018325  | 0.202551  |
| 8                | 6                | 0              | -3.743166               | -0.084476 | -0.595728 |
| 9                | 6                | 0              | -3.216330               | -1.474306 | -0.165738 |
| 10               | 6                | 0              | -1.715195               | -1.543268 | -0.171131 |
| 11               | 8                | 0              | -3.600412               | -1.734226 | 1.175359  |
| 12               | 7                | 0              | 1.041001                | -1.833166 | -0.157373 |
| 13               | 6                | 0              | 2.351349                | -1.976230 | -0.169382 |
| 14               | 6                | 0              | 3.290740                | -0.911760 | -0.079542 |
| 15               | 6                | 0              | 2.795682                | 0.422872  | 0.021893  |
| 16               | 6                | 0              | 3.726457                | 1.477489  | 0.102473  |
| 17               | 6                | 0              | 5.086187                | 1.210683  | 0.085753  |
| 18               | 6                | 0              | 5.572113                | -0.109785 | -0.013060 |
| 19               | 6                | 0              | 4.683489                | -1.161509 | -0.095495 |
| 20               | 1                | 0              | 3.395684                | 2.507564  | 0.180006  |
| 21               | 1                | 0              | 5.790336                | 2.034720  | 0.150493  |
| 22               | 1                | 0              | 6.641844                | -0.291966 | -0.023730 |
| 23               | 1                | 0              | 5.037360                | -2.185755 | -0.172515 |
| 24               | 1                | 0              | 2.721158                | -2.997520 | -0.255901 |
| 25               | 1                | 0              | -1.235627               | -2.513132 | -0.275572 |
| 26               | 1                | 0              | -3.619662               | -2.242462 | -0.844452 |
| 27               | 1                | 0              | -3.568088               | 0.067278  | -1.672232 |
| 28               | 1                | 0              | -3.284905               | 0.856463  | 1.256559  |
| 29               | 1                | 0              | -1.131879               | 2.963556  | 0.241496  |
| 30               | 1                | 0              | 1.304258                | 2.731377  | 0.205949  |
| 31               | 8                | 0              | -5.118784               | -0.016203 | -0.272942 |
| 32               | 8                | 0              | -3.460488               | 2.320659  | -0.096839 |
| 33               | 1                | 0              | -3.445282               | 2.453747  | -1.059286 |
| 34               | 1                | 0              | -5.653317               | -0.284989 | -1.036379 |
| 35               | 1                | 0              | -4.542510               | -1.477899 | 1.226917  |

**Table S15.** Cartesian coordinates of the optimized structure for **15H<sup>+</sup>** (B3LYP/6-31G\*).

| Center<br>Number | Atomic<br>Number | Atomic<br>Type | Coordinates (Angstroms) |           |           |
|------------------|------------------|----------------|-------------------------|-----------|-----------|
|                  |                  |                | X                       | Y         | Z         |
| 1                | 6                | 0              | 1.312834                | 0.472826  | 0.034020  |
| 2                | 6                | 0              | 0.506081                | -0.723582 | -0.040077 |
| 3                | 6                | 0              | -0.947730               | -0.538385 | -0.032662 |
| 4                | 6                | 0              | -1.465210               | 0.806246  | 0.109080  |
| 5                | 6                | 0              | -0.564688               | 1.852105  | 0.172370  |
| 6                | 7                | 0              | 0.771221                | 1.686091  | 0.129793  |
| 7                | 6                | 0              | -2.951421               | 1.030273  | 0.231351  |
| 8                | 6                | 0              | -3.735072               | 0.011907  | -0.611369 |
| 9                | 6                | 0              | -3.329341               | -1.415116 | -0.216881 |
| 10               | 6                | 0              | -1.831083               | -1.579178 | -0.192233 |
| 11               | 8                | 0              | -3.753301               | -1.710468 | 1.106487  |
| 12               | 6                | 0              | 1.147506                | -1.966429 | -0.116686 |
| 13               | 6                | 0              | 2.534074                | -2.051385 | -0.127534 |
| 14               | 6                | 0              | 3.369539                | -0.911374 | -0.065745 |
| 15               | 6                | 0              | 2.766625                | 0.381141  | 0.017577  |
| 16               | 6                | 0              | 3.588668                | 1.516084  | 0.082654  |
| 17               | 6                | 0              | 4.971646                | 1.374665  | 0.065323  |
| 18               | 6                | 0              | 5.572629                | 0.103001  | -0.016828 |
| 19               | 6                | 0              | 4.783160                | -1.028410 | -0.081038 |
| 20               | 1                | 0              | 3.131491                | 2.496514  | 0.147195  |
| 21               | 1                | 0              | 5.598262                | 2.259925  | 0.117039  |
| 22               | 1                | 0              | 6.654322                | 0.015865  | -0.028213 |
| 23               | 1                | 0              | 5.231683                | -2.015760 | -0.143199 |
| 24               | 1                | 0              | 2.997736                | -3.033059 | -0.182153 |
| 25               | 1                | 0              | 0.576557                | -2.887333 | -0.157881 |
| 26               | 1                | 0              | -1.465962               | -2.598258 | -0.279613 |
| 27               | 1                | 0              | -3.761806               | -2.127646 | -0.934770 |
| 28               | 1                | 0              | -3.502149               | 0.175071  | -1.678792 |
| 29               | 1                | 0              | -3.230796               | 0.855780  | 1.278849  |
| 30               | 1                | 0              | -0.918172               | 2.872999  | 0.278771  |
| 31               | 1                | 0              | -4.690120               | -1.436711 | 1.143867  |
| 32               | 8                | 0              | -5.117909               | 0.103539  | -0.365985 |
| 33               | 8                | 0              | -3.365016               | 2.356048  | -0.044825 |
| 34               | 1                | 0              | -5.359475               | 1.045872  | -0.336931 |
| 35               | 1                | 0              | -3.139627               | 2.574821  | -0.966058 |

**Table S16.** Cartesian coordinates of the optimized structure for **16H<sup>+</sup>** (B3LYP/6-31G\*).

| Center<br>Number | Atomic<br>Number | Atomic<br>Type | Coordinates (Angstroms) |           |           |
|------------------|------------------|----------------|-------------------------|-----------|-----------|
|                  |                  |                | X                       | Y         | Z         |
| 1                | 6                | 0              | 1.106290                | -0.466867 | -0.042404 |
| 2                | 6                | 0              | 0.338842                | 0.738761  | -0.112507 |
| 3                | 6                | 0              | -1.129541               | 0.641853  | -0.135733 |
| 4                | 6                | 0              | -1.760017               | -0.661238 | -0.216381 |
| 5                | 6                | 0              | -0.981727               | -1.796233 | -0.161705 |
| 6                | 6                | 0              | 0.412783                | -1.689627 | -0.064206 |
| 7                | 6                | 0              | -3.254339               | -0.756190 | -0.369884 |
| 8                | 6                | 0              | -3.957885               | 0.321681  | 0.463827  |
| 9                | 6                | 0              | -3.423160               | 1.701151  | 0.036947  |
| 10               | 6                | 0              | -1.936570               | 1.746672  | 0.004092  |
| 11               | 1                | 0              | -3.801449               | 1.907933  | -0.979658 |
| 12               | 6                | 0              | 1.015224                | 1.975300  | -0.162264 |
| 13               | 6                | 0              | 2.391237                | 2.030992  | -0.114688 |
| 14               | 6                | 0              | 3.195545                | 0.867261  | -0.013595 |
| 15               | 6                | 0              | 2.560426                | -0.413758 | 0.024538  |
| 16               | 6                | 0              | 3.384315                | -1.555470 | 0.125977  |
| 17               | 6                | 0              | 4.762325                | -1.434485 | 0.183984  |
| 18               | 6                | 0              | 5.383509                | -0.169857 | 0.142170  |
| 19               | 6                | 0              | 4.608387                | 0.965283  | 0.044409  |
| 20               | 1                | 0              | 2.955109                | -2.550206 | 0.166027  |
| 21               | 1                | 0              | 5.371977                | -2.329397 | 0.263537  |
| 22               | 1                | 0              | 6.465259                | -0.095077 | 0.187689  |
| 23               | 1                | 0              | 5.067407                | 1.949342  | 0.011343  |
| 24               | 1                | 0              | 2.884609                | 2.998355  | -0.160071 |
| 25               | 1                | 0              | 0.466756                | 2.904670  | -0.260856 |
| 26               | 1                | 0              | -1.483285               | 2.726260  | 0.125353  |
| 27               | 1                | 0              | -3.812750               | 2.509637  | 0.666711  |
| 28               | 1                | 0              | -3.732873               | 0.142872  | 1.525067  |
| 29               | 1                | 0              | -3.492406               | -0.537522 | -1.430338 |
| 30               | 1                | 0              | -1.455502               | -2.769855 | -0.192760 |
| 31               | 1                | 0              | 0.975672                | -2.615646 | -0.022860 |
| 32               | 8                | 0              | -5.339395               | 0.175141  | 0.201667  |
| 33               | 8                | 0              | -3.684689               | -2.046542 | -0.022381 |
| 34               | 1                | 0              | -5.854355               | 0.496206  | 0.957719  |
| 35               | 1                | 0              | -4.655364               | -2.037738 | -0.086637 |

**Table S17.** Cartesian coordinates of the optimized structure for **17H<sup>+</sup>** (B3LYP/6-31G\*).

| Center<br>Number | Atomic<br>Number | Atomic<br>Type | Coordinates (Angstroms) |           |           |
|------------------|------------------|----------------|-------------------------|-----------|-----------|
|                  |                  |                | X                       | Y         | Z         |
| 1                | 6                | 0              | -1.114162               | 0.539329  | -0.044380 |
| 2                | 6                | 0              | -0.356788               | -0.662367 | -0.087877 |
| 3                | 6                | 0              | 1.103062                | -0.582383 | -0.138626 |
| 4                | 6                | 0              | 1.752320                | 0.702200  | -0.183481 |
| 5                | 6                | 0              | 0.984113                | 1.851597  | -0.123212 |
| 6                | 6                | 0              | -0.411077               | 1.762173  | -0.055543 |
| 7                | 6                | 0              | 3.249296                | 0.763815  | -0.327615 |
| 8                | 6                | 0              | 3.922069                | -0.393137 | 0.425068  |
| 9                | 6                | 0              | 3.342275                | -1.730198 | -0.082403 |
| 10               | 6                | 0              | 1.860015                | -1.732787 | -0.092774 |
| 11               | 1                | 0              | 3.692037                | -1.877615 | -1.120426 |
| 12               | 7                | 0              | -0.911437               | -1.897778 | -0.073954 |
| 13               | 6                | 0              | -2.224439               | -1.982226 | -0.025144 |
| 14               | 6                | 0              | -3.114851               | -0.872155 | 0.016554  |
| 15               | 6                | 0              | -2.560412               | 0.442210  | 0.009928  |
| 16               | 6                | 0              | -3.442157               | 1.540609  | 0.055844  |
| 17               | 6                | 0              | -4.811379               | 1.334839  | 0.105277  |
| 18               | 6                | 0              | -5.355957               | 0.033814  | 0.111124  |
| 19               | 6                | 0              | -4.516154               | -1.059688 | 0.067187  |
| 20               | 1                | 0              | -3.064861               | 2.557473  | 0.052571  |
| 21               | 1                | 0              | -5.477015               | 2.192057  | 0.139828  |
| 22               | 1                | 0              | -6.432079               | -0.100898 | 0.150015  |
| 23               | 1                | 0              | -4.915653               | -2.069978 | 0.070796  |
| 24               | 1                | 0              | -2.640798               | -2.989223 | -0.016610 |
| 25               | 1                | 0              | 1.325965                | -2.679456 | -0.049129 |
| 26               | 1                | 0              | 3.722908                | -2.592309 | 0.478270  |
| 27               | 1                | 0              | 3.710556                | -0.278213 | 1.497962  |
| 28               | 1                | 0              | 3.482007                | 0.615092  | -1.401593 |
| 29               | 1                | 0              | 1.471443                | 2.819166  | -0.132153 |
| 30               | 1                | 0              | -0.971075               | 2.691513  | -0.015886 |
| 31               | 8                | 0              | 5.304880                | -0.272587 | 0.159831  |
| 32               | 8                | 0              | 3.713102                | 2.014254  | 0.111063  |
| 33               | 1                | 0              | 4.682422                | 1.991937  | 0.031416  |
| 34               | 1                | 0              | 5.815686                | -0.662314 | 0.885898  |

**Table S18.** Cartesian coordinates of the optimized structure for **18H<sup>+</sup>** (B3LYP/6-31G\*).

| Center<br>Number | Atomic<br>Number | Atomic<br>Type | Coordinates (Angstroms) |           |           |
|------------------|------------------|----------------|-------------------------|-----------|-----------|
|                  |                  |                | X                       | Y         | Z         |
| 1                | 6                | 0              | 1.074261                | -0.429217 | -0.053289 |
| 2                | 6                | 0              | 0.317524                | 0.801112  | -0.065081 |
| 3                | 6                | 0              | -1.136974               | 0.673700  | -0.114653 |
| 4                | 6                | 0              | -1.711562               | -0.648110 | -0.173769 |
| 5                | 6                | 0              | -0.855561               | -1.735463 | -0.151159 |
| 6                | 7                | 0              | 0.482890                | -1.624098 | -0.092168 |
| 7                | 6                | 0              | -3.207711               | -0.824936 | -0.306906 |
| 8                | 6                | 0              | -3.974746               | 0.303697  | 0.401376  |
| 9                | 6                | 0              | -3.463565               | 1.664363  | -0.082994 |
| 10               | 6                | 0              | -1.987017               | 1.764390  | -0.094447 |
| 11               | 1                | 0              | -3.826610               | 1.818438  | -1.117191 |
| 12               | 6                | 0              | 1.011615                | 2.021050  | -0.019999 |
| 13               | 6                | 0              | 2.396272                | 2.048373  | 0.026851  |
| 14               | 6                | 0              | 3.184417                | 0.870703  | 0.037734  |
| 15               | 6                | 0              | 2.529093                | -0.396962 | -0.002307 |
| 16               | 6                | 0              | 3.302795                | -1.568354 | 0.008788  |
| 17               | 6                | 0              | 4.688932                | -1.485518 | 0.057206  |
| 18               | 6                | 0              | 5.341184                | -0.237547 | 0.096656  |
| 19               | 6                | 0              | 4.599790                | 0.928164  | 0.087120  |
| 20               | 1                | 0              | 2.804424                | -2.530144 | -0.021972 |
| 21               | 1                | 0              | 5.277857                | -2.397702 | 0.064034  |
| 22               | 1                | 0              | 6.425015                | -0.194799 | 0.134123  |
| 23               | 1                | 0              | 5.089662                | 1.897263  | 0.117104  |
| 24               | 1                | 0              | 2.901239                | 3.010571  | 0.055058  |
| 25               | 1                | 0              | 0.479998                | 2.966135  | -0.025099 |
| 26               | 1                | 0              | -1.568218               | 2.767469  | -0.088521 |
| 27               | 1                | 0              | -3.901998               | 2.488033  | 0.492805  |
| 28               | 1                | 0              | -3.781695               | 0.218113  | 1.487296  |
| 29               | 1                | 0              | -3.468909               | -0.773084 | -1.374164 |
| 30               | 1                | 0              | -1.252836               | -2.744920 | -0.196052 |
| 31               | 8                | 0              | -5.346723               | 0.249506  | 0.118810  |
| 32               | 8                | 0              | -3.667861               | -2.096691 | 0.112715  |
| 33               | 1                | 0              | -5.655521               | -0.653275 | 0.308649  |
| 34               | 1                | 0              | -3.438438               | -2.222600 | 1.050139  |
